1 Research article

2 **Phosphoinositide-binding proteins mark, shape and functionally**  
3 **modulate highly-diverged endocytic compartments in the**  
4 **parasitic protist *Giardia lamblia***

5

6 Lenka Cernikova<sup>a</sup>, Carmen Faso<sup>a\*</sup> and Adrian B. Hehl<sup>a\*</sup>

7

8 \* Equally-contributing corresponding authors

9 Email:

10 [ahehl@uzh.ch](mailto:ahehl@uzh.ch) (AH)

11 [carmen.faso@uzh.ch](mailto:carmen.faso@uzh.ch) (CF) and [carmen.faso@izb.unibe.ch](mailto:carmen.faso@izb.unibe.ch)

12

13 **Running head:** PIP-binding proteins in *Giardia lamblia*

14 **Keywords:** endocytosis, *Giardia*, phosphoinositide, lipid-binding domain, lipid-strip,  
15 peripheral vacuoles, clathrin, epsin, PX domain, STED microscopy, APEX, NECAP1,  
16 FYVE

17

18

19

---

<sup>a</sup>Institute of Parasitology, University of Zurich, Winterthurerstrasse 266a, CH-8057 Zurich, Switzerland

## 20 **Abstract**

21 Phosphorylated derivatives of phosphatidylinositol (PIPs), are key membrane lipid  
22 residues involved in clathrin-mediated endocytosis (CME). CME relies on PI(4,5)P<sub>2</sub> to  
23 mark endocytic sites at the plasma membrane (PM) associated to clathrin-coated vesicle  
24 (CCV) formation. The highly diverged parasitic protist *Giardia lamblia* presents  
25 disordered and static clathrin assemblies at PM invaginations, contacting specialized  
26 endocytic organelles called peripheral vacuoles (PVs). The role for clathrin assemblies in  
27 fluid phase uptake and their link to internal membranes via PIP-binding adaptors is  
28 unknown.

29 Here we provide evidence for a robust link between clathrin assemblies and fluid-phase  
30 uptake in *G. lamblia* mediated by proteins carrying predicted PX, FYVE and NECAP1  
31 PIP-binding modules. We show that chemical and genetic perturbation of PIP-residue  
32 binding and turnover elicits novel uptake and organelle-morphology phenotypes. A  
33 combination of co-immunoprecipitation and *in silico* annotation techniques expands the  
34 initial PIP-binding network with addition of new members. Our data indicate that,  
35 despite the partial conservation of lipid markers and protein cohorts known to play  
36 important roles in dynamic endocytic events in well-characterized model systems, the  
37 *Giardia* lineage presents a strikingly divergent clathrin-centered network. This includes  
38 several PIP-binding modules, often associated to domains of currently unknown  
39 function that shape and modulate fluid-phase uptake at PVs.

40

41

## 42 **Introduction**

43 Phosphorylated derivatives of the minor membrane phospholipid phosphatidylinositols  
44 (PIPs) are surface molecules of most eukaryotic endomembrane compartments [1-3].  
45 PIPs play important roles in diverse pathways including signaling cascades, autophagy  
46 and membrane remodelling [2, 4-8]. Their diverse functions are reflected in their  
47 distinct subcellular distribution. PI(4,5)P<sub>2</sub> is highly enriched at the plasma membrane  
48 (PM) with PI(3,4,5)P<sub>3</sub> [4, 5]. PtdIns(4)P's largest pool is at Golgi membranes, with  
49 smaller amounts found at the the PM . PI(3)P is converted into PI(3,5)P<sub>2</sub> on early  
50 endosomes during transition to multivesicular bodies and then late endosomes [6, 7].  
51 PI(3)P is also a marker of phagosomes [8] while PI(5)P marks both the PM and

52 endomembranes [9]. At least 14 distinct PIP-binding modules haven been identified in  
53 eukaryotes, demonstrating a wide range of selective protein-lipid interactions associated  
54 with the PM and internal membranes [10].

55 In addition to their structural functions in membranes, PIPs are involved in  
56 spatiotemporal organization of membrane remodeling processes such as clathrin-coated  
57 vesicles (CCV) formation during clathrin-mediated endocytosis (CME). In particular,  
58 PI(4,5)P<sub>2</sub> marks sites of endocytosis at the PM and recruits proteins involved in the  
59 formation of CCVs [11]. The protein interactomes of mammalian PI(4,5)P<sub>2</sub>-binding  
60 proteins include the early-acting clathrin interacting partners AP2 [12-15],  
61 AP180/CALM [16, 17] and epsin [17, 18]. These factors carry specific PIP-binding  
62 domains that can discriminate between PIP variants to achieve membrane targeting  
63 specificity.

64 *Giardia lamblia* (syn. *intestinalis*, *duodenalis*) is a widespread parasitic protist that  
65 colonizes the upper small intestine of vertebrate hosts. Its life cycle is marked by the  
66 alternation between an environmentally-resistant, infectious cyst stage responsible for  
67 parasite transmission, and a trophozoite stage proliferating by binary fission. Nutrient  
68 uptake of trophozoites in the lumen of the small intestine is almost entirely routed  
69 through peripheral vacuoles (PVs). These organelles are positioned just beneath the PM  
70 and are contacted by funnel-shaped invaginations of the PM that are likely conduits for  
71 uptake of fluid-phase extracellular material [19].

72 A recent characterization of the PV protein interactome using the highly conserved *G.*  
73 *lamblia* clathrin heavy chain (*GlCHC*) as affinity handle confirmed the endocytic nature  
74 of these organelles by highlighting the presence of giardial AP2 (*GlAP2*) subunits, the  
75 single dynamin-like protein *GlDRP* and a putative clathrin light chain *Gl4259* (*GlCLC*;  
76 [19]). Notably absent were components for CCV uncoating and disassembly, consistent  
77 with a lack of measurable clathrin assembly turnover and in line with the observations  
78 that CCVs are missing in *G. lamblia* and clathrin assemblies are static and long-lived.  
79 Therefore, *G. lamblia* presents an unusual endocytic system, characterized by divergent  
80 endocytic compartments (PVs) associated to static clathrin assemblies that are not  
81 predicted to form ordered arrays or higher-order structures such as CCVs yet are closely  
82 membrane-associated.

83 Included in the giardial CHC interactome were three proteins with predicted PIP-  
84 binding domains: FYVE domain protein *Gl16653* and two PX-domain proteins (*Gl7723*  
85 and *Gl16595*), the latter part of a six-member protein family (Table 1; [19, 20]). In a  
86 previous study, we hypothesized that *Gl16653* (*GlFYVE*), *Gl7723* (*GlPXD1*) and *Gl16595*  
87 (*GlPXD2*) act as PIP-binding adaptors to link and maintain static clathrin assemblies at  
88 the PM and PV membrane interface in *G. lamblia* [19]. We further hypothesized that a  
89 perturbation of PIP-binding protein levels and/or function would lead to impaired fluid-  
90 phase uptake by affecting PV functionality. To test these hypotheses, we performed an  
91 in-depth functional characterization of all previously-identified PIP-binding proteins  
92 associated to clathrin at PVs. We assessed their lipid-binding preferences and visualized  
93 their subcellular localizations using electron microscopy and both conventional and  
94 super resolution light microscopy. By manipulating protein levels and/or function we  
95 could elicit novel fluid-phase uptake and PV morphology-related phenotypes, thereby  
96 establishing PIPs as a link between the role of clathrin as a membrane remodeling  
97 proteins and PV-based endocytosis in *G. lamblia*. Furthermore, we used a combination  
98 of co-immunoprecipitation and *in silico* annotation techniques to expand protein  
99 interactomes established previously, thereby discovering a new set of PIP-binding  
100 proteins with roles likely reaching beyond the PV compartment. Lastly, we propose an  
101 updated working model summarizing the complex networks between PIP-binding  
102 proteins and clathrin assemblies at PVs.

103

## 104 **Results**

### 105 *The G. lamblia genome encodes at least seven distinct PIP-binding modules*

106 Given that several types of PIP-binding modules have been identified in eukaryotes, we  
107 determined how many endocytosis-associated module types were actually represented in  
108 the *Giardia* genome, in addition to the known *G. lamblia* epsin, FYVE and PXD variants  
109 [19-23]. For this reason, we selected a total of 14 protein types from various organisms  
110 known to harbor PIP-binding domains, some of them involved in endocytosis. These are:  
111 ANTH (AP180 N-terminal homology), ENTH (epsin N-terminal homology), PH  
112 (Pleckstrin homology domain), FYVE (Fab1, YOTB, Vac1 and EEA1), PX (Phox  
113 homology), BAR (bin, amphiphysin and Rvs), FERM (4.1, ezrin, radixin, moiesin),  
114 PROPPINs ( $\beta$ -propellers that bind PIs), C2 (conserved region-2 of protein kinase C),



115 GOLPH3 (Golgi phosphoprotein 3), PDZ (postsynaptic density 95, disk large, zonula  
116 occludens), PTB (phosphotyrosine binding), Tubby modules and the PH-like module of  
117 the endocytosis-associated NECAP1 protein [24]. Representatives for each module were  
118 used as bait for the HMM-based tool HHpred [25] for protein structure prediction and  
119 the detection of remotely related sequences in the *G. lamblia* predicted proteome (Table  
120 1). Putative *Giardia* protein homologs (Table 1) were then subjected to the online tools  
121 SMART [26, 27] and InterProScan [28] to identify, conserved structural domains and  
122 sequence motifs within a query sequence (Fig 1A).

123 This data mining approach detected high-confidence homologs for hitherto  
124 undiscovered *G. lamblia* proteins containing PH-like, FERM, BAR, FYVE and Proppin  
125 PIP-binding domains (Table 1, Fig 1A). No homologs could be found for the ANTH, C2,  
126 GOLPH3, PDZ, PTB, Tubby and PH PIP-binding module types.

127 Protein GL50803\_17195 (*GlNECAP1*) is a predicted NECAP1 homolog containing a PH-  
128 like domain. Similarly, a conserved PH-like domain found at the C-terminus of FERM  
129 proteins was correlated with high confidence to protein GL50803\_115468 (*GlFERM*).  
130 Immunofluorescence assays (IFAs) and confocal microscopy imaging of an epitope-  
131 tagged *GlNECAP1* reporter expressed as an extra copy under its own promoter showed  
132 localization in close proximity to PVs and in the cytosol (Fig 1B). Similar to *GlNECAP1*,  
133 BAR domain-containing proteins GL50803\_15847 and GL50803\_14045 (*GlBAR1* and 2)  
134 localize in close proximity to PVs (Fig 1B). Tagged reporters for new FYVE and PROPPIN  
135 members GL50803\_16801 (*Gl16801*) and GL50803\_16957 (*GlPROP2*), respectively,  
136 both localise in close proximity to PVs (Fig 1B). In contrast, a tagged *GlFERM* reporter  
137 presents a diffused cytosolic subcellular distribution (Fig 1B).

138 To extend the initial annotation of giardial PIP-binding proteins we performed multiple  
139 sequence alignment (MSA) analyses for each giardial PIP-binding module with selected  
140 orthologs to delineate lipid-binding motifs and residues critical for PIP recognition (Fig  
141 S1). *In silico* structural analyses of the lipid-binding domains of giardial proteins and  
142 their closest homologs were performed *ab initio* using the online tool I-TASSER [29-31].  
143 Comparative analysis of structure models generated with I-TASSER clearly  
144 demonstrated positional conservation of residues critical for PIP binding (Fig S1). Since  
145 *GlPXD1-2*, *GlFYVE* and *GlNECAP1* were experimentally shown to be associated to  
146 giardial clathrin assemblies [19], we selected these proteins and *GlPXD3-6* for more  
147 detailed subcellular localization experiments. Stimulated emission-depletion (STED)  
148 microscopy in co-labelling experiments with Dextran-OG as a marker for fluid-phase

149 endocytosis, unequivocally confirmed accumulation for *GLPXD*1-4 and 6, *GLFYVE* and  
150 *GLNECAP*1 epitope-tagged reporters at PVs (Fig 1C). The signal generated by *GLPXD*5  
151 reporters was insufficient for a conclusive localization.

152 Taken together, *in silico* analysis identifies seven distinct PIP-binding module types  
153 encoded in the *G. lamblia* genome, conserved on both sequence and structural levels.  
154 Subcellular localization of epitope-tagged variants by fluorescence microscopy indicates  
155 clear association to PVs with the exception of *Glepsin*.

156

### 157 *PIP-binding proteins associated with clathrin assemblies present distinct lipid-binding* 158 *profiles in vitro*

159

160 PX domains [32] and FYVE [33-35] preferentially bind PI(3)P. Even though PH domains  
161 have rather promiscuous binding preferences, a subset of PH domains binds strongly to  
162 PtdIns(3,4,5)P<sub>3</sub> and PtdIns(4,5)P<sub>2</sub>, as well as PtdIns(3,4)P<sub>2</sub> [36-38]. Based on the  
163 presence of conserved residues for lipid-binding in the giardial PXD1-6, FYVE and  
164 NECAP1 proteins (Fig S1), we hypothesized that their lipid-binding preferences would  
165 also be conserved. We tested this experimentally by expressing MBP-fused, epitope-  
166 tagged *GLPXD*1-6, *GLFYVE* and *GLNECAP*1 lipid-binding domains (Fig S2A and B). The  
167 recombinant fusion proteins were affinity-purified and used in lipid binding assays  
168 either for commercially-available PIP gradients as membrane-supported arrays (1.56-  
169 100 pmol/spot) (Fig 2A) or membrane strips spotted with defined amounts (100  
170 pmol/spot) of PIPs (Fig S2C). The negative control for binding consisted of a PIP array  
171 probed with purified epitope-tagged MBP alone, whereas the positive control consisted  
172 of a PIP array probed with a commercially-available anti-PI(4,5)P<sub>2</sub> antibody (Fig 2A).

173 Quantification of the chemiluminescence signals shows a marked preference of MBP-  
174 *GLPXD*1 for PI(4,5)P<sub>2</sub> in PIP gradients (Fig 2B) which was corroborated by experiments  
175 using PIP strips (Fig S2C). Under these conditions, *GLPXD*2, 3 and 6 show unexpectedly  
176 promiscuous binding preferences, with *GLPXD*2 presenting a marked affinity for PI(3)P  
177 and PI(4,5)P<sub>2</sub>, *GLPXD*3 for PI(3)P and to a lesser extent PI(5)P, and *GLPXD*6 for PI(3)P,  
178 PI(4)P and PI(5)P (Fig 2B). These data were in line with results from independent PIP  
179 strip experiments (Fig S2C and D). MBP-*GLPXD*4 and MBP-*GLPXD*5 binding preferences  
180 could only be probed using PIP strips (Fig S2C), showing in both cases a marked affinity  
181 for PI(3,5)P<sub>2</sub> and PI(4,5)P<sub>2</sub> (Fig S2C and D). Binding preferences for MBP-*GLFYVE* could

182 not be determined, given that no signal was ever obtained on both PIP arrays and strips  
183 (Fig 2A, Figs S2C and E). Surprisingly, testing of *G/NECAP1* consistently detected  
184 cardiolipin as the preferred lipid moiety (Fig 2C; Fig S2E), with no detectable preference  
185 for PIP residues (Fig S2C). Taken together, our data shows clearly distinguishable lipid  
186 binding profiles *in vitro*, with varying degrees of promiscuity for different PIP-binding  
187 domains.

188 *Saturation of PI(3)P, PI(4,5)P<sub>2</sub> and PI(3,4,5)P<sub>3</sub>, but not PI(4)P binding sites in vivo*  
189 *inhibits PV-mediated uptake of a fluid-phase marker*

190 The marked preference of *G/PIXD1-6* for PIP residues PI(3)P and PI(4,5)P<sub>2</sub> raised the  
191 question whether their saturation of *in vivo* would elicit loss of function phenotypes in  
192 fluid phase uptake by *Giardia* trophozoites. Using a combination of commercially  
193 available antibodies, heterologous reporter constructs and chemical treatment we  
194 saturated sites of PI<sub>3</sub>P, PI(4,5)P<sub>2</sub>, and in addition PI(3,4,5)P<sub>3</sub> and PI(4)P.

195 Detection of PI(3)P, PI(4,5)P<sub>2</sub> and PI(3,4,5)P<sub>3</sub> in chemically fixed trophozoites by  
196 immunofluorescence microscopy with primary PIP-targeted antibodies highlights  
197 enrichment for all PIP moieties in the cortical region containing PVs (Fig S3).

198 Ectopic expression of fluorescent high-affinity reporters for PI(3)P and PI(4)P  
199 2xFYVE::GFP and GFP::P4C [39], respectively, in transgenic *G. lamblia* trophozoites  
200 was used to both identify as well as saturate membranes enriched for PI(3)P and PI(4)P  
201 deposition (Figs 3A-D). Live microscopy of cells expressing 2xFYVE::GFP shows distinct  
202 reporter accumulation in cortical areas consistent with binding to PV membranes (Fig  
203 3B, green panels), whereas representative cells from line GFP::P4C show a more diffused  
204 cytosolic staining pattern, with some accumulation at PVs (Fig 3D, green panels). Fluid-  
205 phase uptake of Dextran-R was assessed in cells from both transgenic lines and  
206 compared to wild-type cells using quantification of signal intensity. Wild-type control  
207 cells and transgenic cells expressing small amounts of 2xFYVE::GFP (Fig 3A)  
208 incorporated large amounts of Dextran-R (Fig 3E). Conversely, a strong 2xFYVE::GFP  
209 signal correlated with low amounts of endocytosed Dextran-R detected at the cell  
210 periphery and with noticeably enlarged cells (Fig 3B). In contrast, there was no  
211 detectable difference in either Dextran-R uptake efficiency (based on fluorescent signal  
212 intensity) or cell width between weak (Fig 3C) and strong expressors (Fig 3D) of the  
213 GFP::P4C line. Cell width (Fig 3F) and fluid-phase uptake (Fig 3G) aberrant phenotypes

214 in 2xFYVE::GFP cells were recorded with respect to wild-type control and GFP::P4C  
215 cells and tested for significance ( $p > 0.05$ ) on 100 cells/line selected in an unbiased  
216 fashion. These data translate into a significant negative correlation between expression  
217 of the PI(3)P-binding 2xFYVE::GFP reporter and fluid-phase uptake (Fig 3H) whereas  
218 only a slight albeit insignificant correlation was found between Dextran uptake and  
219 GFP::P4C expression (Fig 3I).

220 The cationic antibiotic neomycin binds tightly to the headgroup of phosphoinositides  
221 with a marked preference for PI(4,5)P<sub>2</sub> and PI(3,4,5)P<sub>3</sub> [40, 41]. As a means to saturate  
222 PI(4,5)P<sub>2</sub> and PI(3,4,5)P<sub>3</sub> binding in *Giardia* trophozoites, we tested its effect on fluid-  
223 phase uptake by treating wild-type trophozoites with 2mM neomycin followed by uptake  
224 of Dextran-R. Quantitative light microscopy image analysis revealed a significantly lower  
225 level of Dextran-R in treated trophozoites ( $p < 0.05$ ). (Fig 3J, K). Taken together, the data  
226 indicate that saturation of PI(3)P, PI(4,5)P<sub>2</sub>, and PI(3,4,5)P<sub>3</sub>, but not PI(4)P binding  
227 significantly impacts fluid-phase endocytosis through *G. lamblia* PVs.

#### 228 *Functional characterization of GLPXD1-4 and 6, GLFYVE and GLNECAP1*

229 Manipulation of PIP residue homeostasis elicited PV-dependent fluid-phase uptake  
230 phenotypes. We hypothesized that changing expression levels of giardial PIP-binding  
231 proteins previously identified in clathrin interactomes would elicit aberrant uptake  
232 phenotypes in *Giardia* trophozoites. In addition we explored the functional boundaries  
233 of each PIP-binding module by defining their protein interactomes. To test this, we used  
234 the previously-generated epitope-tagged reporter lines for full-length *GLPXD1-4* and 6,  
235 *GLFYVE* and *GLNECAP1* (Fig 1C) for assessing the effects of ectopic expression on fluid-  
236 phase uptake phenotypes. Furthermore, we used the same lines as baits in antibody-  
237 based affinity co-immunoprecipitation (co-IP) and identification of reporter-associated  
238 protein complexes. Further investigation of *GLPXD5* was abandoned at this stage due to  
239 its intractably low levels of expression.

#### 240 The extended interactomes of *GLPXD1*, *GLPXD4* and *GLPXD6*

241 Epitope-tagged, full-length *GLPXD1* is a validated *GLCHC* interaction partner; its  
242 extended interactome confirms association to all core clathrin assembly components  
243 (*GLCHC*, *GLCLC*, *GLDRP*, *GLAP2*) (Fig 4 and Table S1) [19]. A weaker interaction with  
244 *GLPXD2* was also found. The *GLPXD4* interactome includes *GLCHC* and *GLDRP* and,  
245 uniquely for the *GLPXD* protein family, a previously confirmed interaction with *GLPXD2*

246 [19] albeit detected at lower stringencies (95\_2\_95, 2 hits) (Fig 4; Table S4). A putative  
247 SNARE protein GL50803\_5785, previously identified in the *GlTom40* interactome [42],  
248 was detected at lower stringencies (95\_2\_95, 2 hits). Similar to *GlPXD1*, *GlPXD6*  
249 showed strong interaction with the  $\beta$  subunit of *GlAP2* and *GlCHC* (Fig 4), although the  
250 reverse interaction was not detected in the previously-published clathrin-centered  
251 interactome [19]. Using lower stringency parameters (95\_2\_50, 3 hits), revealed  
252 interaction with *GlFYVE*, *GlPXD3* and *GlDRP* (Fig 4; Table S). The *GlPXD6* interactome  
253 includes *Gl16717*, a protein of unknown function predicted to carry a StAR-related lipid-  
254 transfer domain (Steroidogenic Acute Regulatory protein, START) domain [43]. Ectopic  
255 expression of epitope-tagged *GlPXD1*, 4 and 6 elicited no discernible PV-related  
256 phenotypes.

#### 257 Ectopic expression of tagged *GlPXD2* severely perturbs PV organisation

258 Mining the *GlPXD2* protein interactome dataset with high stringency parameters  
259 confirmed interactions with *GlCHC*, *GlAP2* and *GlPXD4* (Fig 5A; Table S2).  
260 Furthermore, we identified three predicted SNARE proteins: *Gl5785*, GL50803\_14469  
261 (*Gl14469*; at lower stringencies 95\_2\_50, 9 hits) and GL50803\_10013 (*Gl10013*; Fig 5A)  
262 [44]. The SNARE *Gl5785* was detected also in the interactomes of *GlPXD4* *GlTOM40*  
263 [42]. *GlNECAP1* was also identified as a *GlPXD2* interacting partner, albeit only by  
264 applying low stringency parameters (95\_2\_50, represented by a dashed line, Fig 5A).

265 In contrast to ectopic expression of tagged *GlPXD1*, 4, and 6, expression of an epitope-  
266 tagged reporter HA::*GlPXD2* elicited a distinct phenotype. In contrast to non-transgenic  
267 wild-type cells (Fig 5C) and weakly-expressing HA::*GlPXD2* cells (Figs 5D and E upper  
268 panels), gated STED imaging of trophozoites strongly expressing HA::*GlPXD2* showed  
269 large membranous clusters which also accumulated Dextran-R (Fig 5D) and were bound  
270 by both anti-*GlCHC* (Fig 5E) and anti-PI(3)P (Fig 5F) antibodies. Transmission electron  
271 microscopy (tEM) analysis confirmed the presence of randomly distributed peripheral  
272 PV clusters in cells expressing HA::*GlPXD2* (Fig 5G; left panel) which were not present  
273 in representative wild-type control cells (Fig 5G; right panel).

274

275 The *GlPXD3* interactome is connected to clathrin assemblies and includes a novel  
276 dynamamin-like protein

277 *GLDRP*, *GLCHC*, and *GLAP2* ( $\alpha/\beta$  subunits) were detected in the *GLPXD3* interactome,  
278 thereby establishing the association of this PX domain protein with clathrin assembly  
279 structures at the PV/PM interface (Fig 6A; Table S3). A pseudokinase (*Gl15411* [45])  
280 previously identified in *GLCHC* assemblies was also found in the *GLPXD3* interactome  
281 (Fig 6A; [19]). Furthermore, the *GLPXD3* and *Gl15411* interactomes share proteins  
282 GL50803\_16811 (*Gl16811*) tentatively annotated as a ZipA protein in GDB, and proteins  
283 GL50803\_87677 (*Gl87677*) and GL50803\_17060 (*Gl17060*), annotated as a NEK kinase  
284 and an ankyrin-domain carrying protein, respectively (Fig 6A). Unique interaction  
285 partners for *GLPXD3* include the SNARE protein *Gl7309* [44] and *GLNSF*  
286 (GL50803\_114776) [46]. In addition, protein GL50803\_103709 carrying a predicted N-  
287 terminal BRO domain and protein GL50803\_9605 were identified as unique *GLPXD3*  
288 interaction partners (Fig 6A). Furthermore, the StAR-related lipid-transfer protein  
289 *Gl16717*, already found in the *GLPXD6* interactome, was also found to be a low-  
290 stringency interaction partner for *GLPXD3* and *Gl15411*, thereby connecting the *GLPXD3*  
291 and *GLPXD6-GLFYVE* circuits. IFA analysis for *Gl15411*, *Gl16811*, *Gl103709*, and *Gl7309*  
292 shows PV-associated labelling profiles for all corresponding epitope-tagged reporters  
293 whereas *GLNSF* presents a diffused localization pattern and *Gl9605* shows a diffused yet  
294 punctate deposition pattern (Fig 6B).

295 Protein *Gl9605*, the sixth most abundant hit in the *GLPXD3* interactome (Fig 6A), and  
296 currently annotated as having an unknown function, was identified as a highly-diverged  
297 dynamin-like protein (Fig 6C). In support of this, the predicted GTPase domain in  
298 *Gl9605* contains signature motifs in the P-loop (G1), switch 1 (G2) and switch 2 (G3)  
299 regions [47-49]. Conserved motifs in the G4 region are only partially maintained (Fig  
300 6D). To test residue conservation on a structural level, *Gl9605* was subjected to *ab initio*  
301 modelling using I-TASSER and the resulting tertiary structure was superimposed on that  
302 of a dynamin-like 2 (DLP2 Cj:50vW) [50], *Gl9605*'s closest structural homologue (Fig  
303 6D). A structural overlap TM-score of 0.913 suggests an almost perfect structural match,  
304 with clear chemical and positional conservation of key residues involved in GTPase  
305 activity (Fig 6E). We sought to elicit a dominant-negative phenotype by engineering  
306 *Gl9605* K73E and S74N mutants [51]. In contrast to either wild-type cells or cells  
307 overexpressing a wild-type epitope-tagged *Gl9605* control, expression of *Gl9605* K73E  
308 and S74N mutant reporters inhibited fluid-phase uptake of Dextran-R in a statistically  
309 significant manner ( $p < 0.05$ ; Fig 6F).

310

311 Regulated ectopic expression of *GlFYVE* variants inhibits fluid-phase uptake and  
312 induces the emergence of novel membrane-bound compartments

313 *GlFYVE* is a confirmed interactor of clathrin assemblies (Zumthor et al., 2016) through  
314 specific association to *GlCHC* and *GlDRP* (Fig 7A) Table S6). *GlFYVE*'s extended  
315 interactome includes *GlPXD6*, *GlNECAP1* and protein GL50803\_16717 (*Gl16717*). The  
316 latter was also found in the *GlPXD6* interactome (Fig 4) and partially localizes to PVs as  
317 an epitope-tagged reporter (Fig 7A).

318 To characterize the function of *GlFYVE* and to test whether a dominant-negative effect  
319 on uptake could be elicited, we performed a deletion analysis by generating epitope-  
320 tagged C-terminal (pCWP1-NT-*GlFYVE*::HA) and N-terminal (pCWP1-CT-*GlFYVE*::HA)  
321 truncation constructs, consisting of either the disordered region followed by the FYVE  
322 domain (Fig 7B), residues 1-300) or the armadillo repeat-rich (ARM repeats) domains  
323 (Fig 7B), residues 301-990), respectively. Expression of both constructs is regulated by  
324 an inducible promoter which is de-repressed during induction of encystation [52]. After  
325 a short (6hrs) induction pulse, transfected cells were subjected to Dextran-R uptake.  
326 Both in cells expressing the full-length pCWP1-*GlFYVE*::HA and truncated variants the  
327 amount of Dextran-R accumulated in PVs was significantly ( $p < 0,05$ ) lower (Fig 7C, box  
328 plot). Furthermore, IFA analysis of pCWP1-NT-*GlFYVE*::HA cells revealed the presence  
329 of membrane-bound compartments which overlapped neither with Dextran-R-labelled  
330 PVs (Fig 7C) nor with encystation specific vesicles (ESVs) labeled with the anti-CWP1  
331 antibody (Fig 7D). In contrast, CT-*GlFYVE*::HA and full length *GlFYVE*::HA localized  
332 predominantly to PVs as (Fig 7C and D). The subcellular localization of *GlCHC* in these  
333 lines and in a wild-type control overlapped with the truncated CT-*GlFYVE*::HA variant,  
334 but only partially with NT-*GlFYVE*::HA and *GlFYVE*::HA (Fig 7E).

335

336 Ectopic expression of *GlNECAP1* significantly impairs fluorescent Dextran uptake

337 Co-IP using epitope-tagged *GlNECAP1* (Figs 1B and C) confirmed interaction with  
338 clathrin assembly components *GlAP2*- $\beta$ ,  $\mu$  and  $\alpha$  subunits, *GlCHC* and *GlDRP* (Table  
339 S7). Interaction with *GlFYVE* (Fig 7A) and, at lower stringency also for *GlPXD2* (Fig 5A)  
340 could be confirmed (Fig 8A).

341

342 Three putative conserved AP2-interacting motifs were identified using multi-sequence  
343 alignment; the high affinity WxxF motif at the N-terminus, two residues being invariant  
344 throughout evolution, K147 and G149, and AP2-beta linker interacting residues binding  
345 sites (Fig 8B) [53]. *De novo* 3D modelling confirms overall structural conservation of all  
346 key residues in *G*/NECAP1 (Fig 8B) when compared with mammalian NECAP1 (Fig 8C).  
347 Furthermore, the interacting interface of NECAP1 with the  $\beta$ -linker region of AP2 was  
348 also identified in the structural model for *G*/NECAP1 (Fig 8C).

349 To test whether expression of a *G*/NECAP1 variant lacking the putative high-affinity  
350 motif WVIF could elicit a dominant-negative uptake effect, a deletion construct  
351 *G*/NECAP1 $\Delta$ WVIF::HA lacking this motif (Fig 8B) for conditional expression in induced  
352 trophozoites. Accumulation of Dextran-R into PVs detected by microscopy was  
353 significantly lower ( $p < 0.05$ ) in induced cells expressing *G*/NECAP1::HA or an APEX-  
354 and epitope- tagged variant *G*/NECAP1::APEX2-2HA compared with wild type controls  
355 (Fig 8D, box plot). Conversely, inducible expression of a deletion construct  
356 *G*/NECAP1 $\Delta$ WVIF::HA (Fig 8D, *G*/NECAP1 $\Delta$ WVIF::HA) had no discernible effect on  
357 accumulation of Dextran-R in PVs (Fig 8D, box plot). Inducible expression of the  
358 genetically encoded enzymatic reporter [54, 55] *G*/NECAP1::APEX2-2HA showed  
359 subcellular distribution of APEX-derived deposits around significantly enlarged PVs in  
360 tEM compared to wild type controls (Fig 8E; Fig S4).

361

### 362 *GLPXD3 associates specifically with PVs as membrane coat*

363 Co-localization studies with Dextran-OG and ectopically expressed HA:: *GLPXD3* show  
364 apparent coating of the entire PV membrane on the cytoplasmic side by the reporter  
365 construct (Fig 9A; Fig S2C) This provided us with an opportunity to generate  
366 measurements of PV organelles in optical sections using 3D STED microscopy followed  
367 by reconstruction and rendering with IMARIS. Rendered images show hive-like  
368 *GLPXD3*-labelled structures predominantly in the cortical area of the cell underneath the  
369 PM that clearly surround the entire PV membrane (Fig 9B). The major and minor  
370 principal axes of these structures measured  $437 \pm 93$  nm and  $271 \pm 60$  nm.  
371 Consistent with the subcellular localization of this marker on the cytoplasmic side of PV  
372 membranes, these values were significantly higher ( $p \leq 0.05$ ) than those obtained from  
373 PVs labeled with Dextran-OG ( $371 \pm 79$  nm and  $221 \pm 49$  nm) (Fig 9C, D). Signal  
374 overlap of epitope-tagged *GLPXD3* with endogenous GLCHC as a marker for the PM-PV



375 interface [19] in fluorescence microscopy is low. The image data indicate that both labels  
376 have distinct distributions but may spatially overlap at focal clathrin assemblies in small  
377 areas at the PV-PM interface (Fig 9E). Similarly, labelling for both PI(3)P and a reporter  
378 *GLPXD3* variant showed minimal signal overlap (Fig 9F), despite the strong affinity of  
379 the latter for this lipid in *in vitro* lipid-array binding experiments (Fig 2A and B).

380

## 381 Discussion

### 382 *PIPs and PIP binders in G. lamblia*

383 PIPs are recognized spatiotemporal organizers and decorate the surface of the eukaryotic  
384 cell's plasma and endo –membrane system [1-3]. *G. lamblia* is no exception; despite its  
385 significant reduction in endomembrane complexity, this species maintains a variety of  
386 PIP residues, mostly located at the cell periphery. We identified 13 novel proteins, in  
387 most cases of unknown function, that carry predicted PIP-binding modules and  
388 primarily localize in close proximity to PVs.

389 All hitherto identified PIP-binding proteins in *G. lamblia* can be loosely grouped in two  
390 categories; they are either relatively small proteins (up to 400 amino acid residues)  
391 consisting almost entirely of the PIP-binding module (e.g. *GLPXD6* and *GLNECAP1*) or  
392 they are large proteins consisting of domains of unknown function associated to a single  
393 predicted domain for PIP-binding (e.g. *GLPXD2* and *GLFYVE*). A full functional  
394 characterization of the latter is a challenge given the level of genomic sequence  
395 divergence in *G. lamblia*. This makes it currently difficult to determine whether  
396 sequences are lineage-specific or so diverged as to be unrecognizable orthologues of  
397 previously-characterized proteins. Hence, structural annotation of large *G. lamblia*  
398 proteins carrying PIP-binding modules such as *GLPXD2* or *GLFYVE* is limited to the lipid  
399 binding domain.

400

401 Eight out of 14 identified PIP-binding modules are either directly or indirectly associated  
402 to clathrin assemblies. Their PIP binding preferences, as measured using *in vitro* lipid-  
403 binding assays, are clearly distinct despite showing a varying degree of promiscuity,  
404 consistent with previously published data [20]. In contrast to previous reports, we could  
405 not measure PIP residue binding activity for *GLFYVE* using *in vitro* lipid-binding assays  
406 [22]. Furthermore, *GLNECAP1* showed a distinctive and highly-specific binding  
407 preference for cardiolipin. This is a surprising finding since cardiolipin is an abundant

408 phospholipid of the inner mitochondrial membrane [56] whose presence in *Giardia* is  
409 controversial [57, 58]. Although *GINECAP1* lacks canonical motifs for cardiolipin  
410 binding [59], previous reports on the identification of cardiolipin-binding PH domains  
411 [60, 61] lend support to the observation that the PH-like domain in *GINECAP1* could  
412 bind cardiolipin, at least *in vitro*. The evolutionary implications for the presence of  
413 cardiolipin in an organism with “bare-bones” mitochondrial remnants i.e. mitosomes,  
414 with no maintenance of membrane potential nor ATP synthesis activity [62], provide for  
415 an exciting research direction worth pursuing.

416

#### 417 *An interactome-based model for PIP-binding proteins and clathrin assemblies at PVs*

418 Unpublished data derived from APEX-mediated tEM experiments on transgenic  
419 trophozoites expressing APEX-tagged clathrin assembly components (*GlCHC* and  
420 *GlCLC*; [19]) show how larger PVs are associated to more than one PM-derived clathrin-  
421 marked invagination (Fig. 10A). This is supported by data from IFA and STED  
422 microscopy analysis of trophozoites loaded with Dextran-OG and labelled with anti-  
423 *GlCHC* antibodies (Fig. 10B). By combining APEX-derived tEM data with STED  
424 microscopy data for both Dextran-OG and *GlPXD3* labelling, a quantified suborganellar  
425 model for PV organization can be built which takes into account organelle size and  
426 relative distribution of clathrin assemblies (Fig. 10C). In this model, *GlPXD3* clearly  
427 emerges as a membrane coat that surrounds individual PV organelles (Fig 10C, upper  
428 panel) on the cytoplasmic side of clathrin assemblies at the PV-PM interface (Fig 10C,  
429 lower panel).

430 The PV-associated PIP-binding protein interactome appears as a tightly knit molecular  
431 network with *GlCHC* at its center (Fig 10D and S5). Despite the high level of  
432 interconnectivity of distinct PIP-binder interactomes (Fig S5), specific molecular circuits  
433 such as the ones defined by the SNARE quartet (Fig 10E), pseudokinase *Gl15411* and  
434 novel DLP *Gl9605* (Fig 10F), as well as StAR-related lipid-transfer protein *Gl16717* (Fig  
435 10G), can be recognized. Notably, *GlPXD1* and 2 are the only PIP-binders whose  
436 extended interactomes include the *G. lamblia* clathrin light chain (Fig 10E and S5),  
437 arguably *GlCHC*'s closest binding partner. The *GlPXD1* interactome further stands out  
438 for enrichment of proteasome-associated components (Table S1), invoking scenarios  
439 concerning clathrin assembly turnover in *G. lamblia*. Although previous data show that  
440 clathrin assemblies are long-lived stable complexes [19], they would still require  
441 remodeling, degradation, and substitution with new components. In the absence of

442 classical components as well as C-terminal motifs on *GlCHC* for ordered disassembly of  
443 clathrin coats, *GlPXD1*'s proteasome-enriched interactome points to proteasome-  
444 mediated degradation of *GlCHC* assemblies as an alternative process to achieve turnover  
445 albeit without recycling of coat components.

446 In the context of clathrin assembly dynamics, *GlNECAP1* once again comes to the  
447 forefront. *NECAP1* is characterized as an AP2 interactor and an important component of  
448 CCVs in the assembly phase [53]. Given that CCVs have not been detected in *Giardia*,  
449 this begs the question of the functional role of a *NECAP1* cardiolipin-binding orthologue  
450 in *G. lamblia* which was found to interact with *G. lamblia* AP2 subunits and *GlFYVE*.  
451 Recent developments in gene knock-out [63] and CRISPR-Cas9-based knock-down [64,  
452 65] methodologies tailored to *G. lamblia* will be instrumental towards a full functional  
453 characterization of *GlNECAP1*'s function(s)

454

#### 455 *Perturbation of PIP binding homeostasis affects fluid-phase uptake*

456 We initially hypothesized that perturbation of either PIP saturation or PIP-binding  
457 activity would elicit fluid-phase uptake phenotypes by impacting PV functionality. The  
458 hypothesis tested positive for the saturation of PI<sub>3</sub>P, PI(3,4,5)P<sub>3</sub>, and PI(4,5)P<sub>2</sub>. A  
459 significant effect on cell width was also detected when PI(3)P binding sites were  
460 saturated by overexpressing 2x*FYVE*::GFP (Figs 3B and F), linking PIP residues to both  
461 endocytic homeostasis and overall maintenance of cell size, possibly in connection to  
462 membrane turnover. Complementing these data, ectopic expression of both *GlFYVE* and  
463 *GlNECAP1* significantly impacted fluid-phase uptake. Furthermore, ectopic expression  
464 of *GlNECAP1* induced an enlarged PV phenotype similar to that induced by expression of  
465 a predicted GTP-locked *GlDRP* mutant [66]. Ectopic expression of a truncated *GlFYVE*  
466 deprived of its ARM repeats induced the formation of membrane-bounded  
467 compartments of undefined origins. ARM folds are superhelical structures mostly  
468 involved in protein-protein interactions [67], suggesting that a loss of these domains  
469 may impact *GlFYVE* function and protein complex formation. In line with this  
470 hypothesis, the NT-*GlFYVE* epitope-tagged reporter loses association to PVs. In contrast  
471 to the *GlFYVE*-induced uptake phenotype and despite a severe PV clustering phenotype,  
472 HA::*GlPXD2*-expressing cells still appear to perform fluid-phase uptake comparably to  
473 wild-type cells. This suggests that PV morphology can be decoupled from effective PV-  
474 mediated uptake. Taken together, these data link PIPs to clathrin assemblies and fluid-

475 phase PV-mediated uptake, providing new insights on clathrin's hitherto unclear role in  
476 *Giardia* endocytosis.

477  
478 *Beyond clathrin assemblies*  
479 Investigation of the molecular *milieu* within which clathrin-associated PIP-binding  
480 proteins operate in *G. lamblia* revealed two protein sets of special interest. Four  
481 predicted SNARE proteins were detected in both the *GLPXD2* and *GLPXD3* interactomes.  
482 Further investigations will be necessary to determine whether the function of this  
483 SNARE quartet is indeed fusing PM and PV membranes at contact sites, thereby  
484 allowing entry of fluid-phase material into PV organelles.

485 Another finding of special interest concerns *Gl9605*, a hitherto unrecognized DLP found  
486 in the interactome of *GLPXD3* with similarity to bacterial DLPs (BDLPs; Fig S6). Similar  
487 to their eukaryotic counterparts, BDLPs are capable of helical self-assembly and  
488 tubulation of lipid bilayers, and were shown to be most closely related to the mitofusins  
489 FZO and OPA (Fig S6) [24, 25], but only distantly related to classical dynamins [26].  
490 BDLPs were also found in the Archaea class Methanomicrobia [68], making the family  
491 ubiquitously distributed across all kingdoms. These data show how the DLP/DRP family  
492 in *G. lamblia* has now expanded to include the previously unidentified endocytosis-  
493 associated *Gl9605* BDLP homologue. *GLDRP* plays a role in the regulation of PV and  
494 encystation-specific vesicle (ESV) size [66]. Although its role in fluid-phase uptake has  
495 not been determined, expression of a GTP-locked *GLDRP* mutant inhibited endocytosis  
496 of biotinylated surface proteins [66]. On the other hand, a similar mutational analysis of  
497 *Gl9605* shows that this DLP variant can elicit a dominant-negative fluid-phase uptake  
498 phenotype. Although we did not test *Gl9605* involvement in surface protein uptake, the  
499 data so far suggest that two distinct DLPs play independent albeit complementary roles  
500 in the regulation of PV-mediated fluid-phase uptake and organelle homeostasis.

501 In this work, we report on the detailed functional characterization of PIP-binding  
502 proteins in *G. lamblia* that associate to clathrin assemblies. Our data reveals a previously  
503 unappreciated level of complex interplay between lipid residues and their protein  
504 binders in marking and shaping endocytic compartments in this parasite. However,  
505 several identified PIP-binding modules appear to associate to PVs *independently* of  
506 clathrin. Their extended interactomes and their involvement in fluid-phase uptake have  
507 yet to be investigated but current data point towards a complex network of PIP binders

508 of varying binding preference and affinity, all working in the same subcellular  
509 environment, yet, in some cases (*GIFERM*, *GLBAR*<sub>1</sub> and <sub>2</sub>, *GLPROP*<sub>1</sub> and <sub>2</sub>, *GL16801*), not  
510 directly linked to clathrin assemblies. The only known exception is *Glepsin* whose  
511 localization remains controversial due to conflicting reports [21, 69]. We systematically  
512 did not detect *Glepsin* in any of the interactomes for clathrin-associated PIP binders, in  
513 line with its localization at the ventral disk [21]. Altogether, the variety of PIP residues  
514 and PIP-binding modules in the *G. lamblia* cortical area containing endocytic PVs  
515 underscores their necessity for correct functioning of membrane traffic even in a protist  
516 so clearly marked by reduction in endomembrane complexity.

517

## 518 **Materials and Methods**

### 519 *Giardia lamblia* cell culture, induction of encystation and transfection

520 *G. lamblia* WBC6 (ATCC catalog number 50803) trophozoites were cultured and  
521 harvested applying standardized protocols [52]. Encystation was induced by the two-  
522 step method as previously described [70, 71]. Transgenic cell lines were generated using  
523 established protocols by electroporation of linearized or circular pPacV-Integ-based  
524 plasmid vectors prepared from *E.coli* as described in [72]. Transgenic lines were then  
525 selected for puromycin resistance (final conc. 50 µg ml<sup>-1</sup>). After selection, transgenic  
526 trophozoites carrying integrated or episomal reporter constructs were further cultured  
527 with or without puromycin, respectively.

528

### 529 *Construction of expression vectors*

530 Oligonucleotide sequences used for cloning in this work are listed in Table S8. pPacV-  
531 Integ-based [34] expression of epitope tagged reporter constructs was driven using  
532 either putative endogenous (pE) or encystation-dependent (pCWP1) promoters.  
533 Constructs 2xFYVE::GFP and GFP::P4C [39] were kindly provided by Dr. H. Hilbi  
534 (University of Zurich).

535

### 536 *PV labelling using fluid-phase markers*

537 Fluid-phase uptake assay in *G. lamblia* was performed as described previously [26]  
538 using dextran coupled to either Oregon Green 488 (Dextran-OG) (Cat. Nr. D-7171,  
539 Thermo Fisher Scientific) or Texas-Red (Dextran-R) (Cat. Nr. D-1863, Thermo Fisher  
540 Scientific) fluorophores, both at 1mg/ml final concentration.

541

### 542 *Co-immunoprecipitation with limited cross-linking*

543 Co-immunoprecipitation *GLPXD1-6*, *GINECAP1*, and *GIFYVE* was done as previously  
544 reported [19, 42]. Protein input was standardized to 0.8mg/ml total protein.

545

### 546 *Protein analysis and sample preparation for mass spectrometry (MS)-based protein* 547 *identification*

548 Protein analysis was performed on 4%/10% polyacrylamide gels under reducing  
549 conditions (molecular weight marker Cat. Nr. 26616, Thermo Scientific, Lithuania).  
550 Immunoblotting was done as described in [73]. Gels for mass spectrometry (MS)  
551 analysis were stained using Instant Blue (Expedeon, Prod. # iSB1L) and destained with  
552 ultra-pure water.

553

### 554 *Mass Spectrometry, protein identification and data storage*

555 MS-based protein identification was performed as described in [19]. Free access to raw  
556 MS data is provided through the ProteomeXchange Consortium on the PRIDE platform  
557 [74]. Accession numbers for datasets derived from bait-specific and corresponding  
558 control co-IP MS analyses are the following: PXD013890 for *GLPXD1*, 3 and 6,  
559 PXD013897 for *GIFYVE*, PXD013896 for *GINECAP* and PXD013899 for *GLPXD2* and 4.

560

### 561 *In silico co-immunoprecipitation dataset analysis*

562 Analysis of primary structure and domain architecture of putative components of  
563 giardial PIP--binding proteins was performed using the following online tools and  
564 databases: SMART for prediction of patterns and functional domains  
565 (<http://smart.embl-heidelberg.de/>), pBLAST for protein homology detection  
566 (<https://blast.ncbi.nlm.nih.gov/Blast.cgi?PAGE=Proteins>), HHPRED for protein  
567 homology detection based on Hidden Markov Model (HMM-HMM) comparison  
568 (<https://toolkit.tuebingen.mpg.de/#/tools/hhpred>), PSORTII for sub-cellular  
569 localisation prediction (<https://psort.hgc.jp/form2.html>), TMHMM for transmembrane  
570 helix prediction (<http://www.cbs.dtu.dk/services/TMHMM/>), RCSB for 3D structure of  
571 homologues (<https://www.rcsb.org/>), and the Giardia Genome Database to extract  
572 organism-specific information such as protein expression levels, predicted molecular  
573 sizes and nucleotide/protein sequences ([www.giardiaDB.org](http://www.giardiaDB.org)). The generated co-IP  
574 datasets were filtered using a dedicated control-co-IP dataset generated using non-

575 transgenic wild-type parasites. Filtration of the bait-specific co-IP and control-co-IP  
576 datasets was done using Scaffold4 (<http://www.proteomesoftware.com/products/>) with  
577 high stringency parameters (95\_2\_95, FDR 0%) and low stringency parameters  
578 (95\_2\_50, FDR 0%). Furthermore, exclusive hits for bait-specific datasets were  
579 manually curated using the following criteria for inclusion into the interactome model: i)  
580 exclusive detection with > 3 spectral counts in bait-specific datasets or ii) an enrichment  
581 of peptide counts >3 with respect to the ctrl. co-IP dataset. Data presented in Tables S1-7  
582 show exclusive and non-exclusive protein hits filtered using both stringency levels.

583  
584 *Immunofluorescence analysis (IFA) and light-microscopy*  
585 Samples for immunofluorescence and analysis of subcellular distribution of reporter  
586 proteins by wide-field and laser scanning confocal microscopy (LSCM) were prepared as  
587 described previously [33, 35]. Nuclear DNA was labelled with 4', 6-diamidino-2-  
588 phenylindole (DAPI). The HA epitope tag was detected with either the anti-HA antibody  
589 (1:50 or 1:100; Anti HA high affinity 3F10, Cat. Nr. 11867423001, Roche), anti-V5 (1:50  
590 or 1:100; V5 Tag Monoclonal Antibody, Cat. Nr. R960-25, Thermo Fisher Scientific) or  
591 self-made antibodies raised against *G1CHC* (dilution 1:1000) followed by an anti-rat  
592 antibody coupled to fluorochrome in case of wide-field or confocal microscopy (1:200;  
593 Goat anti-Rat IgG (H+L) Cross-Adsorbed Secondary Antibody, Alexa Fluor 488, Cat. Nr.  
594 #A11006, Invitrogen) and for STED microscopy (Goat anti-Rat IgG (H+L) Cross-  
595 Adsorbed Secondary Antibody, Alexa Fluor 594, Cat. Nr. A11007, Invitrogen). Specific  
596 PIP residues were detected using anti-PI(3)P (1:100; Purified anti-PI(3)P IgG, Z-P003  
597 Echelon Biosciences), antiPI(4,5)P<sub>2</sub> (1:100; Purified anti-PI(4,5)P<sub>2</sub> IgM, Z-P003  
598 Echelon Biosciences) and anti-PI(3,4,5)P<sub>3</sub> (1:100; Purified anti-PI(3,4,5)P<sub>3</sub> IgM, Z-P045  
599 Echelon Biosciences) followed by an anti-mouse antibody coupled to fluorochrome in  
600 all three cases (Goat anti-Mouse IgG (H+L) Cross-Adsorbed Secondary Antibody, Alexa  
601 flour 594, Cat. Nr. A-11005, Thermo Fischer Scientific or Goat anti-Mouse IgG (H+L)  
602 Cross-Adsorbed Secondary Antibody, Alexa flour 488, Cat. Nr. A-11017, Thermo Fischer  
603 Scientific). Cells were generally imaged at maximum width, with nuclei and the bare-  
604 zone at maximum diameter. Deconvolution was performed with Huygens Professional  
605 (Scientific Volume Imaging). Three-dimensional reconstructions and signal overlap  
606 quantification (Mander's coefficient) in volume images of reconstructed stacks were  
607 performed using IMARIS x64 version 7.7.2 software suite (Bitplane AG) or FIJI [75],  
608 respectively.

609

### 610 *Super resolution (gSTED) microscopy*

611 Sample preparation was done as described for wide field microscopy and LSCM. For  
612 imaging, samples were mounted in ProLong Gold antifade reagent (Cat. Nr. P36934,  
613 Thermo Fisher Scientific). Super resolution microscopy was performed on a LSCM SP8  
614 gSTED 3x Leica (Leica Microsystems) at the Center for Microscopy and Image Analysis,  
615 University of Zurich, Switzerland. Nuclear labelling was omitted due to possible  
616 interference with the STED laser. Further data processing and three dimensional  
617 reconstructions of image stacks were done as described for LSCM.

618

### 619 *Sample preparation for transmission electron microscopy*

620 Transgenic trophozoites expressing *GlPXD2* (GL50803\_16595) and non-transgenic line  
621 were harvested and analysed by transmission electron microscopy (tEM) as described  
622 previously [66].

623

### 624 *DAB staining in APEX2 expressing cells*

625 Transgenic trophozoites expressing *GlNECAP1::APEX2-2HA*, *GlCHC::APEX2-2HA* and  
626 *GlCLC::APEX2-2HA* were harvested and washed with PBS followed by fixation in 2.5%  
627 EM grade glutaraldehyde in cacodylate buffer (100 mM cacodylate (Cat. Nr. 20838),  
628 2mM CaCl<sub>2</sub> (Cat. Nr. 21097, Fluka) in PBS) for 1h at RT. Samples were washed twice  
629 before and after quenching for 5 min in 20mM glycine/cacodylate buffer. For staining,  
630 cells were resuspended in 500ul substrate solution containing 1.4mM DAB  
631 tetrahydrochloride (Cat. Nr. D5637, Sigma) with 0.3mM H<sub>2</sub>O<sub>2</sub> (Cat. Nr. H1009, Sigma)  
632 in cacodylate buffer and incubated for 15 min. The reaction was terminated by washing  
633 thrice in cacodylate buffer and prepared as described for tEM.

634

### 635 *Chemical fixation of DAB-stained cells*

636 DAB stained cell suspensions were post-fixed with 1% aqueous OsO<sub>4</sub> for 1 hour on ice,  
637 subsequently rinsed three times with pure water and dehydrated in a sequence of  
638 ethanol solutions (70% up to 100%), followed by incubation in 100% propylene oxide  
639 and embedding in Epon/Araldite (Sigma-Aldrich, Buchs, Switzerland). Samples were  
640 polymerised at 60°C for 24h. Thin sections were imaged pre- and post- staining with  
641 aqueous uranyl acetate (2%) and Reynolds lead citrate.

642



## 643 *Expression and Purification of Bacterial Fusion Proteins*

644 For each candidate PIP-binding protein, corresponding nucleotide stretches coding for  
645 selected amino acid residues (Table S9) were modified by including an HA-coding  
646 sequence either at the 5' end or the 3' end and then subcloned into the pMal-2Cx *E. coli*  
647 expression vector (New England Biolabs). The resulting recombinant variants were  
648 expressed as maltose-binding protein (MBP) fusions in *E.coli* (strain Bl21) and grown in  
649 LB medium either at 37°C (MBP-*Gl*PXD1, MBP-*Gl*PXD2, MBP-*Gl*PXD3, MBP-*Gl*PXD6,  
650 MBP-*Gl*NECAP1 and MBP-*Gl*FYVE) or 30°C (MBP-*Gl*PXD4 and MBP-*Gl*PXD5) to an  
651 OD<sub>600</sub>=0.4. Induction of expression was performed by adding 0.2 mM IPTG (Isopropyl  
652 β-D-1-thiogalactopyranoside, Cat. Nr. 15529019, Thermo Fischer Scientific) to the  
653 cultures and incubating for a further 4 hours. Cells were harvested at 4°C (4,000 x g)  
654 and bacterial pellets were resuspended in 5 ml of cold column buffer with 1x PIC  
655 (Protease inhibitor cocktail set I; Cat. Nr. 539131-10VL, Merck) and 200 mM PMSF (Cat.  
656 Nr. 329-98-6, Sigma Aldrich). Cells were lysed by sonication and centrifuged (20 min,  
657 9,000 x g, 4°C). Cleared supernatant was incubated with amylose resin slurry (Amylose  
658 Resin High Flow, Cat. Nr. E8022L, BioLabs) for 4 hours at 4°C on a turning wheel,  
659 washed with column buffer and then transferred to an empty column (BioRad 15 ml).  
660 Unbound protein was washed until background OD<sub>280</sub> reached ~0.06. Protein  
661 fractions were eluted using 10mM maltose solution and pooled for overnight dialysis in a  
662 dialysis cassette (Slide-a-Lyzer, Cat. Nr. 66380, Thermo Fischer Scientific) against  
663 25mM NH<sub>4</sub>Ac at 4°C and later lyophilized. Protein fractions were stored at -80°C.

664

## 665 *Protein lipid overlay (PLO) assay*

666 *E. coli*-derived lyophilized proteins were reconstituted in 1x PBS and protein  
667 concentration was measured using the Bradford assay. PIP strips (PIP strips, Cat. Nr. P-  
668 6001 and P-6002, Echelon) or PIP arrays (PIP strips, Cat. Nr. P-6100, Echelon) were  
669 first floated on ultrapure water for 5 min before incubation in blocking buffer (1xPBS  
670 containing 0.1%v/v Tween-20 and 3% fatty-acid free BSA (Sigma A7030)) at RT for 1h.  
671 Thereafter 0.5 μg/ml of protein in PBS containing 3% fatty acid free BSA were incubated  
672 for 1h at RT with gentle agitation. After washing with 1xPBS containing 0.1% v/v Tween-  
673 20, PIP-strips were incubated (1h, RT, agitated) with a monoclonal anti-HA antibody  
674 (clone 3F10, monoclonal antibody from Roche) at a dilution of 1:500 in blocking buffer.  
675 Subsequently strips were washed and incubated (1h, RT, agitated) with a goat-derived  
676 polyclonal anti-rat antibody conjugated to HRP at a dilution of 1:2000 in blocking buffer

677 (Cat. Nr. 3050-05, Southern Biotech). After further washing, strips were developed using  
678 a chemiluminescent substrate (WesternBright ECL HRP Substrate, Cat. Nr. K-12045-  
679 D50).

680

### 681 *Densitometric analysis of lipid strips and arrays*

682 Relative quantification of immunoblotting signal intensity on PIP strips and arrays  
683 overlaid with PIP-binding proteins was performed using FIJI [75]. For each strip or  
684 array, the spot with the highest pixel number was set as a reference for 100% binding;  
685 signals coming from all other spots were normalized against it. The data were visualized  
686 as bar charts of relative signal intensity as a measure of lipid-binding preference for each  
687 PIP-module.

688

### 689 *Identification of giardial orthologues of known PIP-binding domains*

690 PIP-binding domain representatives were used as bait for *in silico* searches within the  
691 *Giardia* genome database (GDB) (<http://giardiadb.org/>) using the online tool HHpred  
692 (<https://toolkit.tuebingen.mpg.de/>) to detect remote giardial homologues using hidden  
693 Markov models (HMMs; Table 1) [25]. Outputs were firstly evaluated based on the  
694 calculated probability and the corresponding E-value for the prediction, with cut-offs for  
695 probability and e-value set to 90 and 1e-10, respectively. Sequence identity and  
696 similarity were also considered. To validate the prediction, candidate giardial PIP-  
697 binding proteins were then utilized as baits to search PDB databases using HHpred to  
698 retrieve orthologous PIP-binding proteins/modules. For additional validation, I-  
699 TASSER [29-31] was also used to predict hypothetical structures of putative giardial PIP-  
700 binding domains next step validation.

701

### 702 *Multiple sequence alignment analysis*

703 Multiple sequence alignment using two or more sequences was performed with the  
704 Clustal Omega sequence alignment algorithm [76, 77]. The sequences used to compile  
705 the alignments shown in supplementary figure 1 were chosen based on representative  
706 members for each PIP-binding domain type [1, 10, 78]. Alignments for figures 6 and 8  
707 were based on previously characterized G1-G4 GTP binding motifs [50] and NECAP1  
708 proteins [53], respectively.

709

## 710 *De novo structural modeling and analysis*

711 *Ab-initio* prediction of hypothetical 3D models presented in supplementary figure 1 was  
712 done using I-TASSER [29-31]. The best model was chosen based on the C-score  
713 predicted by the algorithm. A C-score is a measure of confidence for a model based on  
714 the significance of threading template alignments and the convergence parameters of the  
715 structure assembly simulations. It ranges from -5- to 2, with higher C-scores indicating  
716 higher confidence. The final 3D structures were displayed using PyMOL (The PyMOL  
717 Molecular Graphics System, Version 2.0 Schrödinger, LLC.). The superimposition of  
718 *Giardia* PIP-binding proteins with their closest structural orthologue are based on I-  
719 TASSER predictions, with structural similarities expressed by TM-score and RMSD<sup>a</sup>  
720 values. The TM-score is computed based on the C-score and protein length. It ranges  
721 from 0 to 1, where 1 indicates a perfect match between two structures. RMSD<sup>a</sup> is the root  
722 mean square deviation between residues that are structurally aligned by TM-align [79].  
723 Specifically for *GIBAR*<sub>1</sub> and <sub>2</sub>, the structural overlap analysis was performed by selecting  
724 positively-charged residues from previously characterized BAR domains shown to play a  
725 role in lipid binding [80]. These were manually superimposed on corresponding  
726 residues in the predicted *GIBAR*<sub>1</sub> and <sub>2</sub> structures.

727

## 728 *Phylogenetic analysis*

729 Subjected sequences of GTPase domains were aligned using Clustal Omega tool. The tree  
730 construction was submitted to a PHYLogeny Inference Package (PHYLP) program [81,  
731 82] using random number generator seed set to 111 and number of bootstrap trials set to  
732 10000. The tree was visualised using the on-line tool iTOL and includes branch lengths  
733 as a measure of evolutionary distance [83].

734

| Species and abbreviation        | Protein | UniProtKB Identifier | Residue numbers |
|---------------------------------|---------|----------------------|-----------------|
| <i>Aa - Aquifex aeolicus</i>    | Aa FtsZ | O66809               | 1-240           |
| <i>Bv - Bacillus velezensis</i> | Bv DynA | S6FLE6               | 1-240           |
| <i>Rn - Rattus norvegicus</i>   | Rn MFN1 | Q8R4Z9               | 1-240           |
| <i>Hs - Homo sapiens</i>        | Hs MFN1 | Q8IWA4               | 1-240           |
|                                 | Hs Dyn1 | Q05193               | 1-240           |
|                                 | Hs Dyn3 | Q9UQ16               | 1-240           |
|                                 | Hs Dyn2 | P50570               | 1-240           |

|                                       |          |            |       |
|---------------------------------------|----------|------------|-------|
|                                       | Hs MFN2  | O95140     | 1-240 |
|                                       | Hs DNM1L | O00429     | 1-240 |
|                                       | Hs ATL1  | Q8WXF7     | 1-240 |
|                                       | Hs GBP1  | P32455     | 1-240 |
|                                       | Hs GBP5  | Q96PP8     | 1-240 |
|                                       | Hs GBP3  | Q9HOR5     | 1-240 |
|                                       | Hs GBP2  | P32456     | 1-240 |
|                                       | Hs MX1   | P20591     | 1-240 |
|                                       | Hs OPA1  | O60313     | 1-277 |
|                                       | Hs ATL3  | Q6DD88     | 1-240 |
|                                       | Hs MX2   | P20592     | 1-240 |
|                                       | Hs GBP4  | Q96PP9     | 1-240 |
|                                       | Hs ATL2  | Q8NHH9     | 1-246 |
| <i>Np - Nostoc punctiforme</i>        | Np BDLP  | B2IZD3     | 1-240 |
| <i>Dd - Dictyostelium discoideum</i>  | Dd DynA  | Q94464     | 1-240 |
| <i>Ss - Synechocystis sp.</i>         | Ss FtsZ  | P73456     | 1-240 |
| <i>Ec - Escherichia coli</i>          | Ec LeoA  | Q9RFR9     | 1-240 |
|                                       | Ec FtsZ  | AJF44969.1 | 1-280 |
| <i>Mm - Mus musculus</i>              | Mm ATL1  | Q8BH66     | 1-240 |
| <i>Sc - Saccharomyces cerevisiae</i>  | Sc SEY1  | Q99287     | 1-240 |
|                                       | Sc FZO1  | P38297     | 1-240 |
| <i>Ce - Caenorhabditis elegans</i>    | Ce FZO1  | Q23424     | 1-240 |
| <i>Gl - Giardia lamblia</i>           | Gl DRP   | E2RU04     | 1-320 |
|                                       | Gl 9605  | A8BAT2     | 1-320 |
| <i>Bc - Bacillus cereus</i>           | Bc BDLP  | CUB17917.1 | 1-280 |
| <i>A - Anoxybacillus sp.</i>          | A BDLP1  | KXG09432.1 | 1-280 |
| <i>Cr - Chlamydomonas reinhardtii</i> | Cr FtsZ  | BAB91150.1 | 1-280 |
| <i>Pa - Pseudomonas aeruginosa</i>    | Pa BDLP  | AMT98798.1 | 1-280 |
| <i>At - Agrobacterium tumefaciens</i> | At FtsZ  | AAC45821.1 | 1-280 |
| <i>Sm - Sinorhizobium meliloti</i>    | Sm FtsZ  | AAC45824.1 | 1-280 |
| <i>Lysinibacillus saudiensis</i>      | Ls BDLP  | CEA00228.1 | 1-280 |

735

736

## 737 Main tables and figures

738 Table 1: *G. lamblia* PIP-binding proteins.

739 A compilation of all PIP-binding domains identified in the Giardia Genome Database  
740 ([www.giardadb.org](http://www.giardadb.org); GDB) using previously characterized domains [24] as baits for HMM-based  
741 homology searches (column 1). Predicted giardial orthologs are present for PIP-binding domains  
742 ENTH, PH, FYVE, PX, BAR, FERM and PROPPINS (column 2) and mostly retrieve the correct  
743 domains when used as a baits for reverse HHpred searches (column 4). Except for *Glepsin*,  
744 *GIPXD2* and *GIPROP1* and 2, all others are currently annotated on GDB as generically  
745 “hypothetical”, *i.e.* of unknown function (column 6). Each orthologue was assigned a name used  
746 throughout this report (column 7). Functional domain predictions using SMART  
747 (<http://smart.embl-heidelberg.de/>; column 8) and subcellular localization data (column 9)  
748 either previously reported or acquired in this study (column 10), are also included.

749  
750 Figure 1: Functional domain prediction analysis and subcellular localization of *G.*  
751 *lamblia* PIP-binding proteins.

752 (A) Predicted functional domains for all identified PIP-binding proteins including  
753 positions of repetitive motifs and putative lipid and Zn -binding residues using  
754 HHPRED, HMMER and InterProScan. Ptd – Phosphatidylinositol. (B) Conventional  
755 confocal light-microscopy analysis of representative non-transgenic trophozoites  
756 labelled with Dextran-OG (first panel) to mark PV lumina and of immune-labelled  
757 trophozoites expressing HA-tagged PIP-binding protein reporters. and. Except for  
758 *Glepsin* and *GIFERM*, all tested reporter proteins localise in close proximity to peripheral  
759 vacuoles (PVs) at the cell cortex. Epitope-tagged *G/NECAP1*, *GIPXD5* and *GIPROP1*  
760 additionally show signal distribution throughout the cell. Cells were imaged at maximum  
761 width, where nuclei and the bare-zone are at maximum diameter. Epitope-tagged  
762 *Glepsin*-expressing cells were imaged at maximum width of the ventral side. Insets: DIC  
763 images. Scale bar: 1  $\mu$ m (C) Confocal STED microscopy analysis of trophozoites  
764 expressing clathrin assemblies-associated epitope-tagged PIP-binding reporter proteins  
765 for *GIPXD1-6*, *GIFYVE* and *G/NECAP1* (red channel) co-labelled with Dextran-OG as a  
766 marker for PV lumina (green channel). As shown in the merged insets, although all  
767 reporters are clearly PV-associated, reporters for proteins *GIFYVE* and *GIPXD1* and 2 are  
768 proximal to the PM with respect to Dextran-OG, indicating they reside at the PV-PM  
769 interface. In contrast, reporters for *GIPXD3* and *G/NECAP1* appear to intercalate PVs.  
770 Scale bars: 1  $\mu$ m for full cell image, 1  $\mu$ m for insets.  
771

772 Figure 2: Lipid-binding properties of selected giardial PIP-binding domains.

773 (A) Membrane-supported lipid arrays spotted with gradients of different phosphorylated  
774 variants of phosphatidylinositol (PtdIns), from 100pmol (A) to 1.56pmol/spot (G), were  
775 probed with fixed amounts (2.5  $\mu$ g ) of clathrin assemblies-associated epitope-tagged  
776 PIP-binding domains from *GIPXD1-6*, *G/NECAP1* and *GIFYVE*, followed by  
777 immunodetection of the epitope tag. Lipid-binding preferences for the protein fusion  
778 partner MBP (MBP alone) and for antibodies raised against PI(4,5)P2 (anti-PI(4,5)P2)

779 were included as negative and positive controls for binding, respectively. No signal using  
780 arrays was obtained for MBP::*GlPXD4* and MBP::*GlPXD5*, however, binding preferences  
781 for these fusions were determined using lipid strips (Figs S2A and B). (B) Plots of  
782 densitometric analyses using FIJI for each MBP-fused PIP-binding domain and each  
783 spotted PI/PIP residue based on array data presented in (A). (C) Testing of the binding  
784 affinity of the MBP-fused PIP-binding domain from *GlNECAP1* on a wider range of lipid  
785 residues detects cardiolipin as the preferred substrate.

786

787 Figure 3: Saturation of PI(3)P, PI(4,5)P<sub>2</sub> and PI(3,4,5)P<sub>3</sub> binding sites in *G. lamblia*  
788 trophozoites elicits uptake and morphological phenotypes

789 Light microscopy-based immunofluorescence analysis of representative transgenic trophozoites  
790 expressing *Legionella*-derived PIP-binding constructs. (A-B) Compared to low 2xFYVE::GFP-  
791 expressing cells from the same population, saturation of PI(3)P binding sites in cells highly  
792 overexpressing a regulated encystation-dependent epitope-tagged construct 2xFYVE::GFP (anti-  
793 HA) inhibits uptake of fluid-phase marker Dextran-R. Scale bars: 1  $\mu$ m. (C-D) Expression levels  
794 of PI(4)P-binding epitope-tagged construct GFP::P4C expression (anti-HA) have no visible  
795 impact on Dextran-R signal at PVs of transfected cells. Scale bars: 1  $\mu$ m. (E) Dextran-R uptake in  
796 non-transgenic wild-type cells as negative controls for construct-induced uptake phenotypes.  
797 Scale bars: 1  $\mu$ m (F) Box-plot representing the distribution of cell width (in  $\mu$ m) across at least  
798 100 wild-type, 2xFYVE::GFP- and GFP::P4C- expressing cells selected in an unbiased fashion. A  
799 statistically significant (two-sided t-test assuming unequal variances,  $p < 0.05$ ) increase in  
800 median cell width with respect to non-transgenic cells is detected for 2xFYVE::GFP- but not  
801 GFP::P4C- expressing cells. Asterisks indicate statistical significance. n.s.: not significant. (G)  
802 Box-plot representing the distribution of measured Dextran-R signal intensity across at least 100  
803 wild-type, 2xFYVE::GFP- and GFP::P4C- expressing cells selected in an unbiased fashion. A  
804 statistically significant (two-sided t-test assuming unequal variances,  $p < 0.05$ ) decrease in  
805 Dextran-R signal intensity, normalized to wild-type cells (100%), is detected for 2xFYVE::GFP-  
806 but not for GFP::P4C- expressing cells. Asterisks indicate statistical significance. n.s.: not  
807 significant. (H) A statistically significant ( $p < 0.5$ ) linear correlation exists between Dextran-R  
808 signal ( $x$ -axis, intensity\_red channel [%]) and 2xFYVE::GFP expression ( $y$ -axis, intensity\_green  
809 channel [%]) measured across 100 cells. (I) The apparent linear correlation between GFP::P4C  
810 expression ( $y$ -axis, intensity\_green channel [%]) and Dextran-R signal ( $x$ -axis, intensity\_red  
811 channel [%]) is not statistically significant ( $p < 0.5$ ). (J) Wide-field microscopy-based  
812 immunofluorescence analysis of the impact of Neomycin treatment on Dextran-R uptake to  
813 deplete PI(4,5)P<sub>2</sub> and PI(3,4,5)P<sub>3</sub> binding sites in non-transgenic wild-type cells. With respect to  
814 non-treated cells (WT; left panel), Dextran-R signal at PVs is visibly impacted in neomycin-  
815 treated cells (WT\_Neo; right panel). Scale bars: 10  $\mu$ m for full wide-field image, 1  $\mu$ m for a single  
816 cell. (K) Box-plot representing the distribution of measured Dextran-R signal intensity across  
817 100 wild-type cells, either untreated (WT) or treated with neomycin (WT\_Neo). Neomycin  
818 treatment causes a statistically significant (two-sided t-test assuming unequal variances,  $p < 0.05$ )  
819 decrease in Dextran-R signal. Scale bars: wide-field: 10  $\mu$ m; single cells: 1  $\mu$ m. For all images,  
820 nuclei are labelled with DAPI (blue). Insets: DIC images.

821 Figure 4: The extended interactomes of *GlPXD1*, *GlPXD4* and *GlPXD6*

822 Curated core interactomes for *GlPXD1*, *GlPXD4* and *GlPXD6*. All three epitope-tagged  
823 variants used as affinity handles in co-immunoprecipitation experiments identify *GlCHC*  
824 as a strong interaction partner for *GlPXD1*, 4 and 6. *GlPXD1* and 4 further interact with  
825 other known clathrin assembly components such as *GlCLC*, *GlAP2* subunits  $\alpha$ ,  $\beta$  and  $\mu$ ,  
826 and *GlDRP*. *GlPXD2*, albeit at low stringency, is the only other PXD protein found in all  
827 three interactomes. The *GlPXD4* interactome includes a putative SNARE protein (5785;  
828 [42] while *GlPXD6* as an affinity handle pulled down another PIP residue binder,  
829 *GlFYVE*, known to be associated to clathrin assemblies in *G. lamblia* [19]. Solid lines:  
830 interactions detected at high stringency. Dashed lines: interactions detected at low  
831 stringency. Yellow partners are currently annotated on GDB as “hypothetical protein” *i.e.*  
832 proteins of unknown function.

833  
834 Figure 5: The extended interactome of *GlPXD2* and the impact of *GlPXD2* ectopic  
835 expression on PV morphology

836 (A) The extended interactome analysis of epitope-tagged *GlFYVE* confirms tight  
837 association to *GlCHC*, *GlDRP* and *GlPXD6*. *GlNECAP1* as an alternative PIP-binding module was  
838 also detected. (B) C-terminally epitope-tagged full-length (top; pCWP1-*GlFYVE*::HA), C-  
839 terminal truncated (middle; pCWP1-NT-*GlFYVE*::HA, residues 1-300) and N-terminal truncated  
840 (bottom; pCWP1-CT-*GlFYVE*::HA, 301-990 residues) constructs were generated for regulated  
841 expression and phenotype testing. (C) Confocal imaging and immunofluorescence analysis of  
842 non-transgenic wild-type cells and in cells overexpressing constructs *GlFYVE*::HA, NT-  
843 *GlFYVE*::HA or pCWP1-CT-*GlFYVE*::HA (anti-HA) shows statistically significant (two-sided t-  
844 test assuming unequal variances,  $p < 0.05$ ) differences in their ability to take up Dextran-R. Cells  
845 overexpressing construct pCWP1-NT-*GlFYVE*::HA present additional membrane-bound  
846 structures that are not detected in other lines and do not associate with Dextran-R labelling.  
847 Asterisks indicate statistical significance: \*  $p < 0.05$ ; \*\*  $p < 0.005$ . n.s.: not significant. DIC:  
848 differential interference contrast. Scale bars: 1  $\mu\text{m}$ . (D) Confocal imaging and  
849 immunofluorescence analysis of non-transgenic wild-type cells and cells overexpressing  
850 constructs *GlFYVE*::HA, NT-*GlFYVE*::HA or pCWP1-CT-*GlFYVE*::HA (anti-HA) using anti-  
851 CWP1-TxRed antibody (anti-CWP1) shows that the membrane compartments found in NT-  
852 *GlFYVE*::HA-expressing cells are not related to ESVs. Scale bars: 1  $\mu\text{m}$ . (E) Antibody-based  
853 detection and immunofluorescence analysis of *GlCHC* deposition (anti-CHC) in non-transgenic  
854 wild-type cells and in cells overexpressing constructs *GlFYVE*::HA, NT-*GlFYVE*::HA or pCWP1-  
855 CT-*GlFYVE*::HA (anti-HA) detects a significant degree of *GlCHC* association to the CT-  
856 *GlFYVE*::HA variant, with only partial association to NT-*GlFYVE*::HA and *GlFYVE*::HA  
857 constructs. Scale bars: 1  $\mu\text{m}$ .

858  
859  
860 Figure 6: The extended *GlPXD3* interactome includes a novel dynamin-like protein in *G.*  
861 *lamblia*

862 (A) Left panel: Analysis of the extended *GlPXD3* interactome using an epitope-tagged variant as  
863 affinity handle reveals robust interactions with clathrin assembly components *GlCHC*,  $\alpha$  and  $\beta$

864 *GLAP2* subunits, and *GLDRP*. Predicted inactive inactive NEK kinase 15411 [45] is similarly  
865 associated to clathrin assemblies [19] and further shares proteins *Gl16811*, *Gl87677* and *Gl17060*  
866 as interaction partners with *GLPXD3*. Predicted SNARE protein *Gl7309*, *GLNSF*  
867 (*GL50803\_1154776*) and proteins *Gl103709* and *Gl9605* are unique *GLPXD3* interaction  
868 partners. The *GLPXD3* interactome is connected to the *GLPXD6* circuit both directly and through  
869 *Gl16717*. Solid lines: interactions detected at high stringency. Dashed lines: interactions detected  
870 at low stringency. Yellow partners are currently annotated on GDB as “hypothetical protein” *i.e.*  
871 proteins of unknown function. Right panel: Total spectral counts as a measure of relative  
872 abundance for interaction candidates in the interactomes of *GLPXD3* and *Gl15411* epitope-tagged  
873 variants. Hashtag: detection at low stringency (95\_2\_50) and visualised with a dashed line in  
874 the interactome. (B) Light-microscopy-based immunofluorescence analysis of representative  
875 transgenic trophozoites expressing epitope-tagged reporter variants for proteins *Gl15411*,  
876 *Gl16811*, *Gl103709*, *GLNSF*, *Gl9605*, *Gl7309* and *Gl16717*. Cells were imaged at maximum width,  
877 where nuclei and the bare-zone are at maximum diameter. Nuclei are labelled with DAPI (blue).  
878 Insets: DIC images. Scale bars: 1  $\mu\text{m}$  (C) MSA analysis G1-Ploop, G2 switch1, G3 switch 2 and G4  
879 regions of the conserved GTPase domains of *Gl9605*, *GLDRP*, *Campylobacter jejuni* DLP1  
880 (Uniprot accession CJO411) and DLP2 (CJO412), *Nostoc punctiforme* BDLP1 (B2IZD3), *Bacillus*  
881 *subtilis* DynAD1 (P54159), *Bacillus cereus* DynAD2 (CUB17917), and *Escherichia coli* LeoA  
882 (E3PN25) bacterial dynamin-like proteins (BDLPs), *Homo sapiens* MFN1 (Q8IWA4), MFN2  
883 (O95140), OPA1 (O60313) and DYN1 (Q05193), and *Saccharomyces cerevisiae* Fzo1p (P38297).  
884 Conserved positions are highlighted in grey. (D) I-TASSER *de novo* predicted 3D structure for  
885 *Gl9605* (blue) and its closest known structural homologue, *C. jejuni* DLP2 (5owvC; green)  
886 indicating the GTPase, neck and trunk regions that characterize BDLPs. (E) A close-up view of  
887 the overlapping structures in the GTPase domains of *Gl9605* (blue) and *C. jejuni* DLP2 (5owvC;  
888 green) marking specific residues important for GTP binding and catalytic activity. (F)  
889 Quantitative microscopy-based immunofluorescence analysis of Dextran-R signal in cells  
890 overexpressing either a non-mutated full length epitope-tagged *Gl9605* or mutated *Gl9605* K73E  
891 and S74N variants. In contrast to non-transgenic wild-type controls and *Gl9605::HA*  
892 overexpressing cells, expression of *Gl9605* K73E and S74N variants inhibited Dextran-TxR  
893 uptake in a statistically significant fashion (box-plot). Asterisks indicate statistical significance.  
894 n.s.: not significant.  
895

896 Figure 7: Regulated ectopic expression of *GLFYVE* variants inhibits fluid-phase uptake  
897 and induces novel membrane-bound compartments

898 (A) The extended interactome analysis of epitope-tagged *GLFYVE* confirms tight  
899 association to *GLCHC*, *GLDRP* and *GLPXD6*. *GLNECAP1* as an alternative PIP-binding module was  
900 also detected. (B) C-terminally epitope-tagged full-length (top; pCWP1-*GLFYVE::HA*), C-  
901 terminal truncated (middle; pCWP1-NT-*GLFYVE::HA*, residues 1-300) and N-terminal truncated  
902 (bottom; pCWP1-CT-*GLFYVE::HA*, 301-990 residues) constructs were generated for regulated  
903 expression and phenotype testing. (C) Confocal imaging and immunofluorescence analysis of  
904 non-transgenic wild-type cells and in cells overexpressing constructs *GLFYVE::HA*, NT-  
905 *GLFYVE::HA* or pCWP1-CT-*GLFYVE::HA* (anti-*HA*) shows statistically significant (two-sided t-  
906 test assuming unequal variances,  $p < 0.05$ ) differences in their ability to take up Dextran-R. Cells  
907 overexpressing construct pCWP1-NT-*GLFYVE::HA* present additional membrane-bound  
908 structures that are not detected in other lines and do not associate with Dextran-R labelling.  
909 Asterisks indicate statistical significance: \*  $p < 0.05$ ; \*\*  $p < 0.005$ . n.s.: not significant. DIC:  
910 differential interference contrast. Scale bars: 1  $\mu\text{m}$ . (D) Confocal imaging and  
911 immunofluorescence analysis of non-transgenic wild-type cells and cells overexpressing  
912 constructs *GLFYVE::HA*, NT-*GLFYVE::HA* or pCWP1-CT-*GLFYVE::HA* (anti-*HA*) using anti-  
913 CWP1-TxRed antibody (anti-CWP1) shows that the membrane compartments found in NT-  
914 *GLFYVE::HA*-expressing cells are not related to ESVs. Scale bars: 1  $\mu\text{m}$ . (E) Antibody-based  
915 detection and immunofluorescence analysis of *GLCHC* deposition (anti-*CHC*) in non-transgenic  
916 wild-type cells and in cells overexpressing constructs *GLFYVE::HA*, NT-*GLFYVE::HA* or pCWP1-



917 CT-*GIFYVE*::HA (anti-HA) detects a significant degree of *GICHC* association to the CT-  
918 *GIFYVE*::HA variant, with only partial association to NT-*GIFYVE*::HA and *GIFYVE*::HA  
919 constructs. Scale bars: 1  $\mu\text{m}$ .  
920

921 Figure 8: PV morphology and functionality phenotypes caused by *GINECAP1* ectopic  
922 expression.

923 (A) A *GINECAP1*-centered interactome highlights association to clathrin assembly components  
924 and to additional PIP-residue binders *GIFYVE* and *GLPXD2*. (B) Multiple sequence alignment  
925 analysis of *GINECAP1* and *NECAP1* orthologues from *Arabidopsis thaliana* (Uniprot accession  
926 Q84WV7), *Trichinella pseudospiralis* (A0A0V1JQ20), *Caenorhabditis elegans* (Q9N489),  
927 *Echinococcus multilocularis* (A0A087VZS0), *Ceratitidis capitata* (W8CD89), *Homo sapiens*  
928 (Q8NC96) and *Mus musculus* (Q9CR95) identifies conserved motifs and residues for interaction  
929 with AP2. *GINECAP1* presents partial conservation, with a WXXF motif (orange) shifted to the  
930 N-terminus with respect to other orthologues. (C) *Ab initio* template-based 3D modelling of *G.*  
931 *lamblia* and *H. sapiens* *NECAP1* (1tqz) homologues predicts similar structures, with  
932 conservation of key residues involved in the interaction between *NECAP1* proteins and AP2  
933 complexes (shaded in blue and green). (D) Wild-type non-transgenic control cells (WT) and cells  
934 overexpressing either epitope-tagged *GINECAP1* reporters *GINECAP1*::HA, *GINECAP1*::APEX2-  
935 2HA or the  $\Delta$ WVIF deletion construct *GINECAP1* $\Delta$ WVIF::HA (green) were tested for Dextran-R  
936 (red). Dextran-R signal intensity was significantly ( $p < 0.05$ ) decreased in *GINECAP1*::HA- and  
937 *GINECAP1*::APEX2-2HA- expressing cells compared to wild-type controls and  
938 *GINECAP1* $\Delta$ WVIF::HA-expressing cells (box-plot). (E) Quantitative tEM analysis of  
939 *GINECAP1*::APEX2-2HA-expressing cells (upper panels) and wild-type non-transgenic cells  
940 (WT; lower panels) shows visibly enlarged PVs in *GINECAP1*::APEX2-2HA-expressing cells, with  
941 a statistically significant ( $p < 0,05$ ) increase in median PV area (in  $\mu\text{m}^2$ ; box-plot).

942

943

944 Figure 9: *GLPXD3* membrane coats as a tool to probe PV size and organization

945 (A) A dorsal view of representative cells expressing an epitope-tagged *GLPXD3* reporter  
946 (red) and co-labelled for Dextran-OG (green). STED confocal imaging followed by signal  
947 overlap analysis (scatter plot) shows proximal yet distinct deposition patterns, with  
948 *GLPXD3* reporters closely associated to Dextran-OG-illuminated PVs. Scale bars: whole  
949 cell 1  $\mu\text{m}$ ; close-ups 1  $\mu\text{m}$ . (B) 3D STED microscopy (left panel) followed by  
950 reconstruction using IMARIS (middle panel) of a representative cell expressing an  
951 epitope-tagged *GLPXD3* reporter reveals fenestrated *GLPXD3*-delimited areas distributed  
952 under the PM and throughout the whole cell (close-up view of inset in the right panel).  
953 Scale bars: whole cell 1  $\mu\text{m}$ ; close-ups 1  $\mu\text{m}$ . (C) STED microscopy analysis of PVs in a  
954 representative non-transgenic wild-type cell labelled with Dextran-OG. Scale bars: whole  
955 cell 1  $\mu\text{m}$ ; close-ups 1  $\mu\text{m}$ . (D) Average length of the major and minor principle axes of  
956 *GLPXD3*-delimited fenestrated structures (in red) and Dextran-labelled PV organelles in  
957 wild-type non-transgenic cells (in green) measured across at least 100  
958 structures/organelles. (E) STED confocal microscopy analysis of ventral and dorsal  
959 views of a representative cell expressing an epitope-tagged *GLPXD3* reporter (anti-HA)

960 and co-labelled for *GlCHC* (anti-CHC) shows how fenestrated *GlPXD3*-delimited  
961 structures are decorated with *GlCHC* foci. Scatter plots are included for signal overlap  
962 analysis. Scale bars: whole cell 1  $\mu\text{m}$ ; close-ups 1  $\mu\text{m}$ . (F) Similar to *GlCHC*, anti-PI(3)P  
963 antibodies (anti-PI(3)P) detect foci of PI(3)P accumulation in close proximity to *GlPXD3*  
964 epitope-tagged reporters (anti-HA) in HA::*GlPXD3*-expressing cells analysed with STED  
965 microscopy. Scatter plots are included for signal overlap analysis. Scale bars: whole cell 1  
966  $\mu\text{m}$ ; close-ups 1  $\mu\text{m}$ .

967  
968 **Figure 10: A working model for PV-associated nanoenvironments defined by clathrin**  
969 **assemblies and PIP-binding proteins**

970 (A) Electron microscopy images of *G. lamblia* cells expressing an APEX2-tagged *GlCHC* (upper  
971 panels) or *GlCLC* (lower panels) reporter show darker APEX2-derived deposits at the PM-PV  
972 interface (arrows). Scale bar: 0.1  $\mu\text{m}$ . (B) IFA analysis of a representative non-transgenic wild-  
973 type cell labelled with Dextran-OG and anti-*GlCHC* antibodies to illuminate PV lumina and the  
974 PV-PM interface, respectively. Scale bar: 1  $\mu\text{m}$ . (C) Schematic reconstruction of a surface view  
975 (left panel) of the PV system associated to clathrin assemblies (blue) and *GlPXD3* coats (red),  
976 based on data presented in this report and in [13]. PV membranes and lumina are represented in  
977 dark and light green, respectively. Cross-sections at (1) and (2) yield views in the right panel,  
978 highlighting foci of clathrin assemblies beneath the PM, above *GlPXD3*'s coat-like deposition  
979 pattern surrounding PVs. (D) An overview of the *G. lamblia* PIP-binding interactome associated  
980 to PVs. All represented PIP-binding proteins were found to contact clathrin assemblies (*GlCHC*)  
981 in either reciprocal (double-headed arrows) or one-way (single-headed arrows) modes of  
982 interaction, following filtering of co-IP data either at high (black solid lines) or low (grey dashed  
983 lines) stringency. (E-G) Nanoenvironments defined by specific sets of interaction partners  
984 including clathrin assemblies, PIP-binding proteins, SNARES and proteins of currently  
985 unknown function.

986  
987

## 988 **Supplementary tables and figures**

989  
990 Supplemental Tables 1-7: Proteins identified in the interactomes of *GlPXD1-4* and 6,  
991 *GlFYVE* and *GlNECAP1*

992 Supplemental Table 8: List of oligonucleotide names and sequences for construct  
993 synthesis

994 Supplemental Table 9: Amino acid sequences of lipid-binding modules used in vitro for  
995 protein lipid-overlay assay

996 Supplemental Figure 1: Multiple sequence alignment and structural prediction analysis  
997 of *G. lamblia* PIP-binding domains.

998  
999 Supplemental Figure 2: Lipid-binding properties of *Giardia*-lipid binding domains.

1000 Supplemental Figure 3: Subcellular distribution of PI(3)P, PI(4,5)P<sub>2</sub> and PI(3,4,5)P<sub>3</sub> in  
1001 *G. lamblia* trophozoites

1002 Supplemental Figure 4: APEX-mediated electron microscopy analysis of *GLNECAP1*  
1003 subcellular deposition.

1004  
1005 Supplemental Figure 5: Overview of core protein interactomes determined from co-IP  
1006 analyses

1007  
1008 Supplemental Figure 6: Phylogenetic analysis and tree reconstruction for the predicted  
1009 GTPase domain of the novel dynamin-like protein *Gl9605*.

## 1010 Acknowledgements

1011 ABH was supported by Swiss National Science Foundation grants 140803 and 125389.  
1012 Florian Schmidt and Ritta Rabbat are acknowledged for their technical assistance. Dr.  
1013 Hubert Hilbi (University of Zurich) is gratefully acknowledged for sharing *Legionella*-  
1014 derived constructs 2xFYVE::GFP and GFP::P4C.

1015

## 1016 References

- 1017 1. Balla, T., *Phosphoinositides: tiny lipids with giant impact on cell regulation*. *Physiol Rev*,  
1018 2013. **93**(3): p. 1019-137.
- 1019 2. Di Paolo, G. and P. De Camilli, *Phosphoinositides in cell regulation and membrane*  
1020 *dynamics*. *Nature*, 2006. **443**(7112): p. 651-7.
- 1021 3. Vance, J.E. and D.E. Vance, *Metabolic insights into phospholipid function using gene-*  
1022 *targeted mice*. *J Biol Chem*, 2005. **280**(12): p. 10877-80.
- 1023 4. Yeung, T., et al., *Lipid metabolism and dynamics during phagocytosis*. *Curr Opin Cell*  
1024 *Biol*, 2006. **18**(4): p. 429-37.
- 1025 5. McMahon, H.T. and E. Boucrot, *Molecular mechanism and physiological functions of*  
1026 *clathrin-mediated endocytosis*. *Nature reviews. Molecular cell biology*, 2011. **12**(8): p.  
1027 517-33.
- 1028 6. Ho, C.Y., T.A. Alghamdi, and R.J. Botelho, *Phosphatidylinositol-3,5-bisphosphate: no*  
1029 *longer the poor PIP<sub>2</sub>*. *Traffic*, 2012. **13**(1): p. 1-8.
- 1030 7. Schink, K.O., C. Raiborg, and H. Stenmark, *Phosphatidylinositol 3-phosphate, a lipid*  
1031 *that regulates membrane dynamics, protein sorting and cell signalling*. *Bioessays*, 2013.  
1032 **35**(10): p. 900-12.
- 1033 8. Simonsen, A., et al., *Alfy, a novel FYVE-domain-containing protein associated with*  
1034 *protein granules and autophagic membranes*. *J Cell Sci*, 2004. **117**(Pt 18): p. 4239-51.
- 1035 9. Viaud, J., et al., *Phosphatidylinositol 5-phosphate: a nuclear stress lipid and a tuner of*  
1036 *membranes and cytoskeleton dynamics*. *Bioessays*, 2014. **36**(3): p. 260-72.
- 1037 10. Kutateladze, T.G., *Translation of the phosphoinositide code by PI effectors*. *Nature*  
1038 *chemical biology*, 2010. **6**(7): p. 507-13.
- 1039 11. Jost, M., et al., *Phosphatidylinositol-4,5-bisphosphate is required for endocytic coated*  
1040 *vesicle formation*. *Curr Biol*, 1998. **8**(25): p. 1399-402.

- 1041 12. Collins, B.M., et al., *Molecular architecture and functional model of the endocytic AP2*  
1042 *complex*. Cell, 2002. **109**(4): p. 523-35.
- 1043 13. Gaidarov, I. and J.H. Keen, *Phosphoinositide-AP-2 interactions required for targeting to*  
1044 *plasma membrane clathrin-coated pits*. J Cell Biol, 1999. **146**(4): p. 755-64.
- 1045 14. Jackson, L.P., et al., *A large-scale conformational change couples membrane recruitment*  
1046 *to cargo binding in the AP2 clathrin adaptor complex*. Cell, 2010. **141**(7): p. 1220-9.
- 1047 15. Rohde, G., D. Wenzel, and V. Haucke, *A phosphatidylinositol (4,5)-bisphosphate binding*  
1048 *site within mu2-adaptin regulates clathrin-mediated endocytosis*. J Cell Biol, 2002.  
1049 **158**(2): p. 209-14.
- 1050 16. Ford, M.G., et al., *Simultaneous binding of PtdIns(4,5)P2 and clathrin by AP180 in the*  
1051 *nucleation of clathrin lattices on membranes*. Science, 2001. **291**(5506): p. 1051-5.
- 1052 17. Itoh, T., et al., *Role of the ENTH domain in phosphatidylinositol-4,5-bisphosphate*  
1053 *binding and endocytosis*. Science, 2001. **291**(5506): p. 1047-51.
- 1054 18. Ford, M.G., et al., *Curvature of clathrin-coated pits driven by epsin*. Nature, 2002.  
1055 **419**(6905): p. 361-6.
- 1056 19. Zumthor, J.P., et al., *Static Clathrin Assemblies at the Peripheral Vacuole-Plasma*  
1057 *Membrane Interface of the Parasitic Protozoan Giardia lamblia*. PLoS pathogens, 2016.  
1058 **12**(7): p. e1005756.
- 1059 20. Jana, A., A. Sinha, and S. Sarkar, *Phosphoinositide binding profiles of the PX domains of*  
1060 *Giardia lamblia*. Parasitology international, 2017. **66**(5): p. 606-614.
- 1061 21. Ebnetter, J.A. and A.B. Hehl, *The single epsin homolog in Giardia lamblia localizes to the*  
1062 *ventral disk of trophozoites and is not associated with clathrin membrane coats*.  
1063 *Molecular and biochemical parasitology*, 2014. **197**(1-2): p. 24-7.
- 1064 22. Sinha, A., et al., *Identification and characterization of a FYVE domain from the early*  
1065 *diverging eukaryote Giardia lamblia*. Current microbiology, 2011. **62**(4): p. 1179-84.
- 1066 23. Touz, M.C., C. Feliziani, and A.S. Ropolo, *Membrane-Associated Proteins in Giardia*  
1067 *lamblia*. Genes (Basel), 2018. **9**(8).
- 1068 24. Ritter, B., et al., *Identification of a family of endocytic proteins that define a new alpha-*  
1069 *adaptin ear-binding motif*. EMBO reports, 2003. **4**(11): p. 1089-95.
- 1070 25. Zimmermann, L., et al., *A Completely Reimplemented MPI Bioinformatics Toolkit with a*  
1071 *New HHpred Server at its Core*. J Mol Biol, 2018. **430**(15): p. 2237-2243.
- 1072 26. Letunic, I., T. Doerks, and P. Bork, *SMART: recent updates, new developments and status*  
1073 *in 2015*. Nucleic Acids Res, 2015. **43**(Database issue): p. D257-60.
- 1074 27. Letunic, I. and P. Bork, *20 years of the SMART protein domain annotation resource*.  
1075 *Nucleic Acids Res*, 2018. **46**(D1): p. D493-D496.
- 1076 28. Jones, P., et al., *InterProScan 5: genome-scale protein function classification*.  
1077 *Bioinformatics*, 2014. **30**(9): p. 1236-40.
- 1078 29. Zhang, Y., *I-TASSER server for protein 3D structure prediction*. BMC Bioinformatics,  
1079 2008. **9**: p. 40.
- 1080 30. Roy, A., A. Kucukural, and Y. Zhang, *I-TASSER: a unified platform for automated*  
1081 *protein structure and function prediction*. Nat Protoc, 2010. **5**(4): p. 725-38.
- 1082 31. Yang, J., et al., *The I-TASSER Suite: protein structure and function prediction*. Nat  
1083 *Methods*, 2015. **12**(1): p. 7-8.
- 1084 32. Yu, J.W. and M.A. Lemmon, *All phox homology (PX) domains from Saccharomyces*  
1085 *cerevisiae specifically recognize phosphatidylinositol 3-phosphate*. J Biol Chem, 2001.  
1086 **276**(47): p. 44179-84.
- 1087 33. Ridley, S.H., et al., *FENS-1 and DFCEP1 are FYVE domain-containing proteins with*  
1088 *distinct functions in the endosomal and Golgi compartments*. J Cell Sci, 2001. **114**(Pt 22):  
1089 p. 3991-4000.

- 1090 34. Stahelin, R.V., et al., *Phosphatidylinositol 3-phosphate induces the membrane*  
1091 *penetration of the FYVE domains of Vps27p and Hrs*. J Biol Chem, 2002. **277**(29): p.  
1092 26379-88.
- 1093 35. Blatner, N.R., et al., *The molecular basis of the differential subcellular localization of*  
1094 *FYVE domains*. J Biol Chem, 2004. **279**(51): p. 53818-27.
- 1095 36. Lemmon, M.A. and K.M. Ferguson, *Signal-dependent membrane targeting by pleckstrin*  
1096 *homology (PH) domains*. Biochem J, 2000. **350 Pt 1**: p. 1-18.
- 1097 37. Lemmon, M.A., *Pleckstrin homology domains: not just for phosphoinositides*. Biochem  
1098 Soc Trans, 2004. **32**(Pt 5): p. 707-11.
- 1099 38. DiNitto, J.P. and D.G. Lambright, *Membrane and juxtamembrane targeting by PH and*  
1100 *PTB domains*. Biochim Biophys Acta, 2006. **1761**(8): p. 850-67.
- 1101 39. Weber, S., M. Wagner, and H. Hilbi, *Live-cell imaging of phosphoinositide dynamics and*  
1102 *membrane architecture during Legionella infection*. MBio, 2014. **5**(1): p. e00839-13.
- 1103 40. Aharonovitz, O., et al., *Intracellular pH regulation by Na(+)/H(+) exchange requires*  
1104 *phosphatidylinositol 4,5-bisphosphate*. The Journal of cell biology, 2000. **150**(1): p. 213-  
1105 24.
- 1106 41. Schacht, J., *Purification of polyphosphoinositides by chromatography on immobilized*  
1107 *neomycin*. J Lipid Res, 1978. **19**(8): p. 1063-7.
- 1108 42. Rout, S., et al., *An Interactome-Centered Protein Discovery Approach Reveals Novel*  
1109 *Components Involved in Mitosome Function and Homeostasis in Giardia lamblia*. PLoS  
1110 pathogens, 2016. **12**(12): p. e1006036.
- 1111 43. Ponting, C.P. and L. Aravind, *START: a lipid-binding domain in StAR, HD-ZIP and*  
1112 *signalling proteins*. Trends Biochem Sci, 1999. **24**(4): p. 130-2.
- 1113 44. Elias, E.V., et al., *Characterization of SNAREs determines the absence of a typical Golgi*  
1114 *apparatus in the ancient eukaryote Giardia lamblia*. The Journal of biological chemistry,  
1115 2008. **283**(51): p. 35996-6010.
- 1116 45. Manning, G., et al., *The minimal kinome of Giardia lamblia illuminates early kinase*  
1117 *evolution and unique parasite biology*. Genome biology, 2011. **12**(7): p. R66.
- 1118 46. Datta, S.P., et al., *Multiple paralogues of alpha-SNAP in Giardia lamblia exhibit*  
1119 *independent subcellular localization and redistribution during encystation and stress*.  
1120 Parasites & vectors, 2018. **11**(1): p. 539.
- 1121 47. Leipe, D.D., et al., *Classification and evolution of P-loop GTPases and related ATPases*.  
1122 Journal of molecular biology, 2002. **317**(1): p. 41-72.
- 1123 48. Ford, M.G., S. Jenni, and J. Nunnari, *The crystal structure of dynamin*. Nature, 2011.  
1124 **477**(7366): p. 561-6.
- 1125 49. Wenger, J., et al., *Functional mapping of human dynamin-1-like GTPase domain based*  
1126 *on x-ray structure analyses*. PLoS One, 2013. **8**(8): p. e71835.
- 1127 50. Liu, J., J.K. Noel, and H.H. Low, *Structural basis for membrane tethering by a bacterial*  
1128 *dynamin-like pair*. Nature communications, 2018. **9**(1): p. 3345.
- 1129 51. Damke, H., et al., *Dynamin GTPase domain mutants block endocytic vesicle formation at*  
1130 *morphologically distinct stages*. Molecular biology of the cell, 2001. **12**(9): p. 2578-89.
- 1131 52. Hehl, A.B., M. Marti, and P. Kohler, *Stage-specific expression and targeting of cyst wall*  
1132 *protein-green fluorescent protein chimeras in Giardia*. Molecular biology of the cell,  
1133 2000. **11**(5): p. 1789-800.
- 1134 53. Ritter, B., et al., *NECAP 1 regulates AP-2 interactions to control vesicle size, number,*  
1135 *and cargo during clathrin-mediated endocytosis*. PLoS biology, 2013. **11**(10): p.  
1136 e1001670.
- 1137 54. Lam, S.S., et al., *Directed evolution of APEX2 for electron microscopy and proximity*  
1138 *labeling*. Nature methods, 2015. **12**(1): p. 51-4.



- 1139 55. Martell, J.D., et al., *Engineered ascorbate peroxidase as a genetically encoded reporter*  
1140 *for electron microscopy*. Nature biotechnology, 2012. **30**(11): p. 1143-8.
- 1141 56. Koshkin, V. and M.L. Greenberg, *Cardiolipin prevents rate-dependent uncoupling and*  
1142 *provides osmotic stability in yeast mitochondria*. The Biochemical journal, 2002. **364**(Pt  
1143 1): p. 317-22.
- 1144 57. Makiuchi, T. and T. Nozaki, *Highly divergent mitochondrion-related organelles in*  
1145 *anaerobic parasitic protozoa*. Biochimie, 2014. **100**: p. 3-17.
- 1146 58. Rosa Ide, A., et al., *Cardiolipin, a lipid found in mitochondria, hydrogenosomes and*  
1147 *bacteria was not detected in Giardia lamblia*. Experimental parasitology, 2008. **120**(3): p.  
1148 215-20.
- 1149 59. Duncan, A.L., et al., *Cardiolipin dynamics and binding to conserved residues in the*  
1150 *mitochondrial ADP/ATP carrier*. Biochimica et biophysica acta. Biomembranes, 2018.  
1151 **1860**(5): p. 1035-1045.
- 1152 60. Sano, E., et al., *Novel tyrosine phosphorylated and cardiolipin-binding protein CLPABP*  
1153 *functions as mitochondrial RNA granule*. Biochim Biophys Acta, 2008. **1783**(6): p. 1036-  
1154 47.
- 1155 61. Maeda, A., et al., *Role of N-myristoylation in stability and subcellular localization of the*  
1156 *CLPABP protein*. Biochem Biophys Res Commun, 2018. **495**(1): p. 1249-1256.
- 1157 62. Shiflett, A.M. and P.J. Johnson, *Mitochondrion-related organelles in eukaryotic protists*.  
1158 Annu Rev Microbiol, 2010. **64**: p. 409-29.
- 1159 63. Ebnetter, J.A., et al., *Cyst-Wall-Protein-1 is fundamental for Golgi-like organelle*  
1160 *neogenesis and cyst-wall biosynthesis in Giardia lamblia*. Nat Commun, 2016. **7**: p.  
1161 13859.
- 1162 64. McNally, S.G., et al., *Robust and stable transcriptional repression in Giardia using*  
1163 *CRISPRi*. Mol Biol Cell, 2019. **30**(1): p. 119-130.
- 1164 65. Lin, Z.Q., et al., *Development of CRISPR/Cas9-mediated gene disruption systems in*  
1165 *Giardia lamblia*. PLoS One, 2019. **14**(3): p. e0213594.
- 1166 66. Gaechter, V., et al., *The single dynamin family protein in the primitive protozoan Giardia*  
1167 *lamblia is essential for stage conversion and endocytic transport*. Traffic, 2008. **9**(1): p.  
1168 57-71.
- 1169 67. Groves, M.R. and D. Barford, *Topological characteristics of helical repeat proteins*. Curr  
1170 Opin Struct Biol, 1999. **9**(3): p. 383-9.
- 1171 68. Bramkamp, M., *Structure and function of bacterial dynamin-like proteins*. Biological  
1172 chemistry, 2012. **393**(11): p. 1203-14.
- 1173 69. Feliziani, C., et al., *The giardial ENTH protein participates in lysosomal protein*  
1174 *trafficking and endocytosis*. Biochimica et biophysica acta, 2015. **1853**(3): p. 646-59.
- 1175 70. Boucher, S.E. and F.D. Gillin, *Excystation of in vitro-derived Giardia lamblia cysts*.  
1176 Infection and immunity, 1990. **58**(11): p. 3516-22.
- 1177 71. Morf, L., et al., *The transcriptional response to encystation stimuli in Giardia lamblia is*  
1178 *restricted to a small set of genes*. Eukaryotic cell, 2010. **9**(10): p. 1566-76.
- 1179 72. Stefanic, S., et al., *Neogenesis and maturation of transient Golgi-like cisternae in a*  
1180 *simple eukaryote*. Journal of cell science, 2009. **122**(Pt 16): p. 2846-56.
- 1181 73. Konrad, C., C. Spycher, and A.B. Hehl, *Selective condensation drives partitioning and*  
1182 *sequential secretion of cyst wall proteins in differentiating Giardia lamblia*. PLoS  
1183 pathogens, 2010. **6**(4): p. e1000835.
- 1184 74. Vizcaino, J.A., et al., *2016 update of the PRIDE database and its related tools*. Nucleic  
1185 acids research, 2016. **44**(D1): p. D447-56.
- 1186 75. Schindelin, J., et al., *Fiji: an open-source platform for biological-image analysis*. Nat  
1187 Methods, 2012. **9**(7): p. 676-82.

- 1188 76. Goujon, M., et al., *A new bioinformatics analysis tools framework at EMBL-EBI*. Nucleic  
1189 Acids Res, 2010. **38**(Web Server issue): p. W695-9.
- 1190 77. Sievers, F., et al., *Fast, scalable generation of high-quality protein multiple sequence*  
1191 *alignments using Clustal Omega*. Mol Syst Biol, 2011. **7**: p. 539.
- 1192 78. Lemmon, M.A., *Membrane recognition by phospholipid-binding domains*. Nature  
1193 reviews. Molecular cell biology, 2008. **9**(2): p. 99-111.
- 1194 79. Kufareva, I. and R. Abagyan, *Methods of protein structure comparison*. Methods Mol  
1195 Biol, 2012. **857**: p. 231-57.
- 1196 80. Moravcevic, K., et al., *Comparison of Saccharomyces cerevisiae F-BAR domain*  
1197 *structures reveals a conserved inositol phosphate binding site*. Structure, 2015. **23**(2): p.  
1198 352-63.
- 1199 81. Felsenstein, J., *Evolutionary Trees from Gene Frequencies and Quantitative Characters:*  
1200 *Finding Maximum Likelihood Estimates*. Evolution, 1981. **35**(6): p. 1229-1242.
- 1201 82. Felsenstein, J., *Using the quantitative genetic threshold model for inferences between and*  
1202 *within species*. Philos Trans R Soc Lond B Biol Sci, 2005. **360**(1459): p. 1427-34.
- 1203 83. Letunic, I. and P. Bork, *Interactive Tree Of Life (iTOL) v4: recent updates and new*  
1204 *developments*. Nucleic Acids Res, 2019.
- 1205

## Figure 1: Functional domain prediction analysis and subcellular localization of *G. lamblia* PIP-binding proteins.

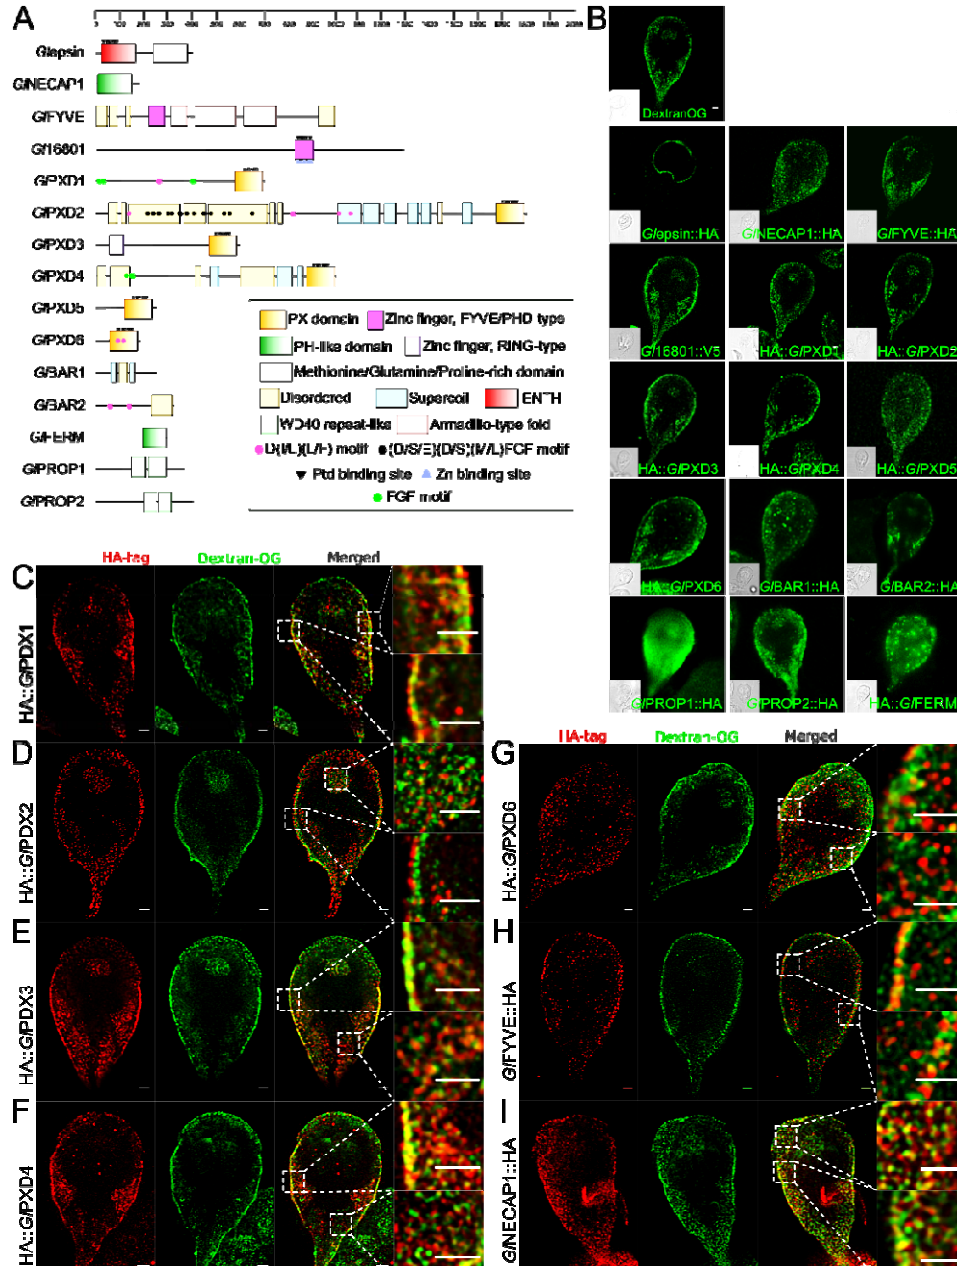



**Figure 2: Lipid-binding properties of selected giardial PIP-binding domains.**

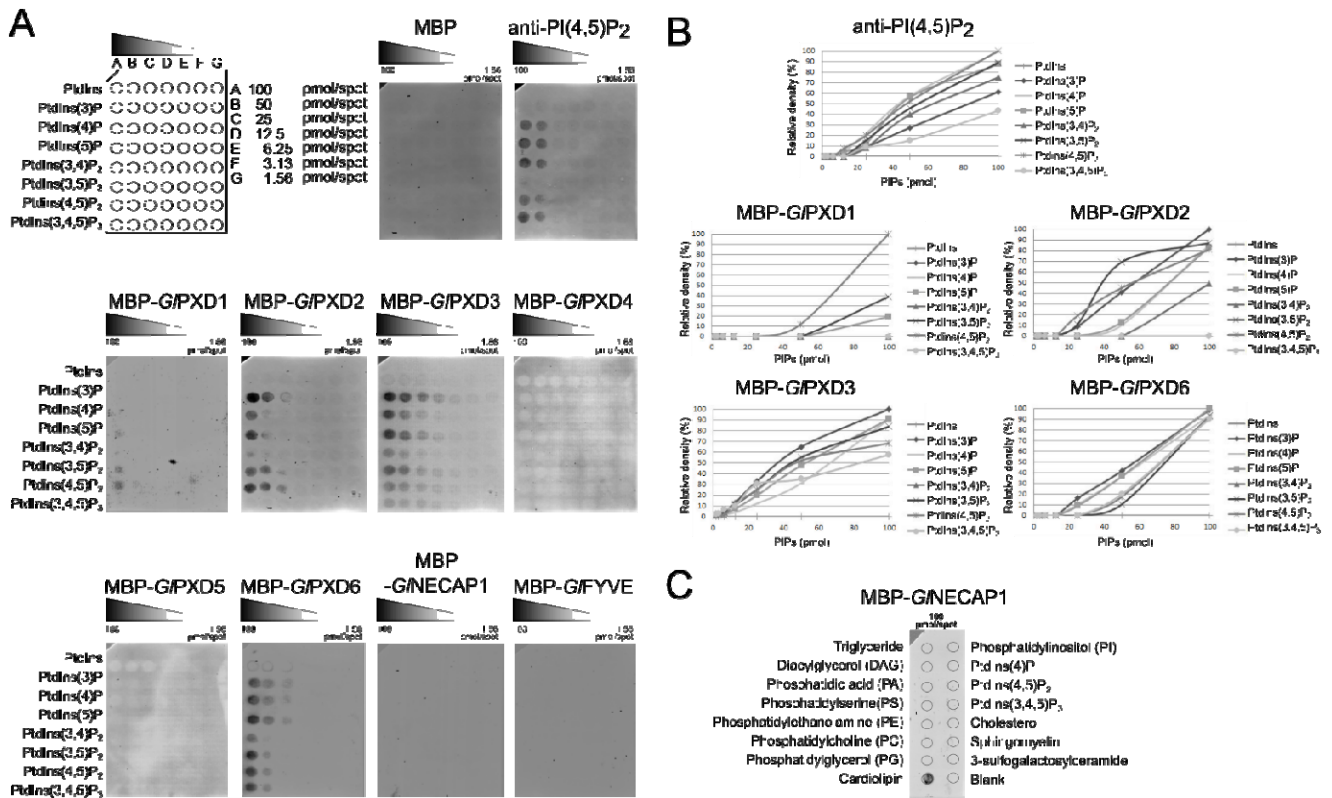

### Figure 3: Saturation of PI(3)P, PI(4,5)P<sub>2</sub> and PI(3,4,5)P<sub>3</sub> binding sites in *G. lamblia* trophozoites elicits uptake and morphological phenotypes

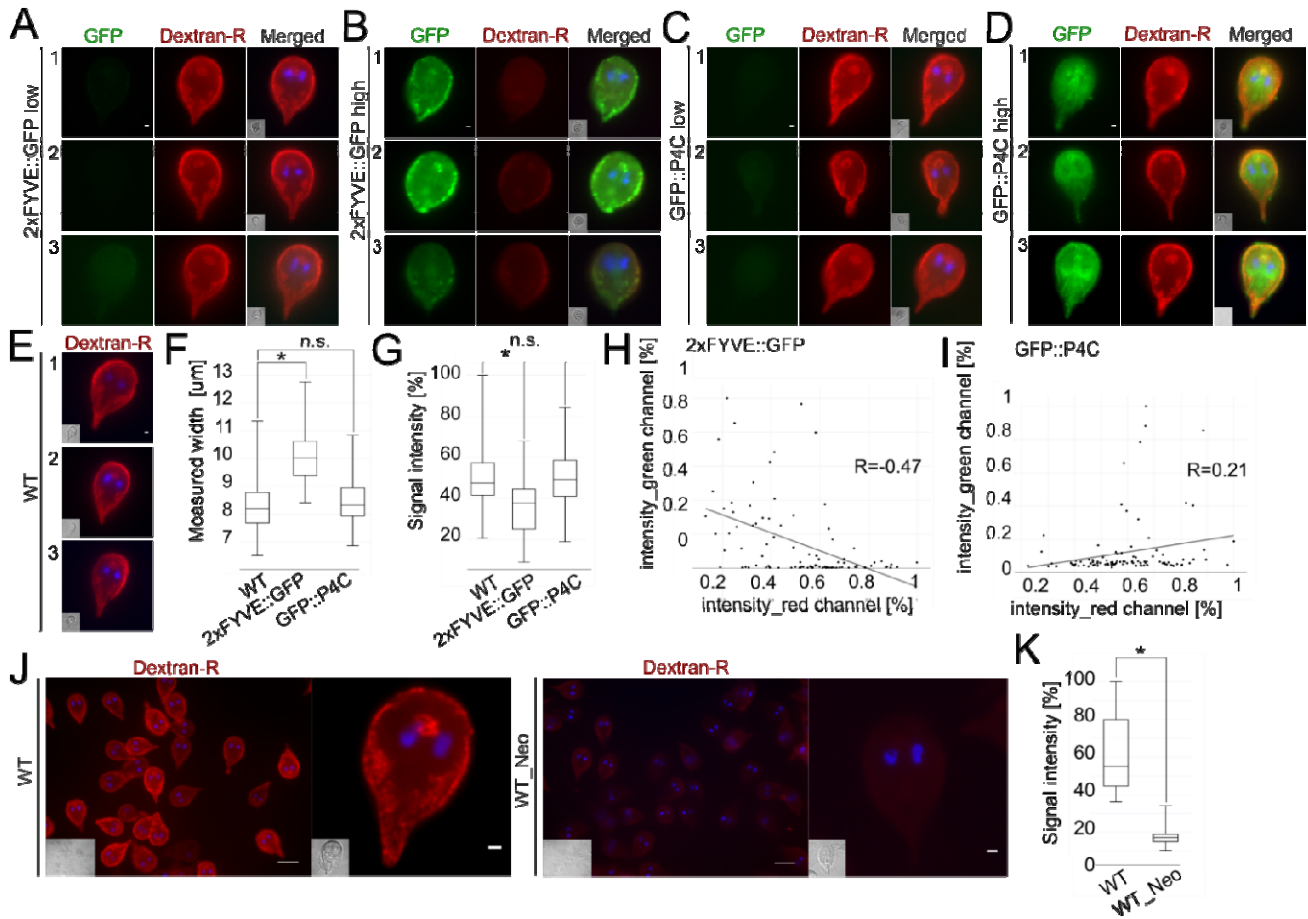

**Figure 4: The extended interactomes of *GlPX*1, *GlPX*4 and *GlPX*6**

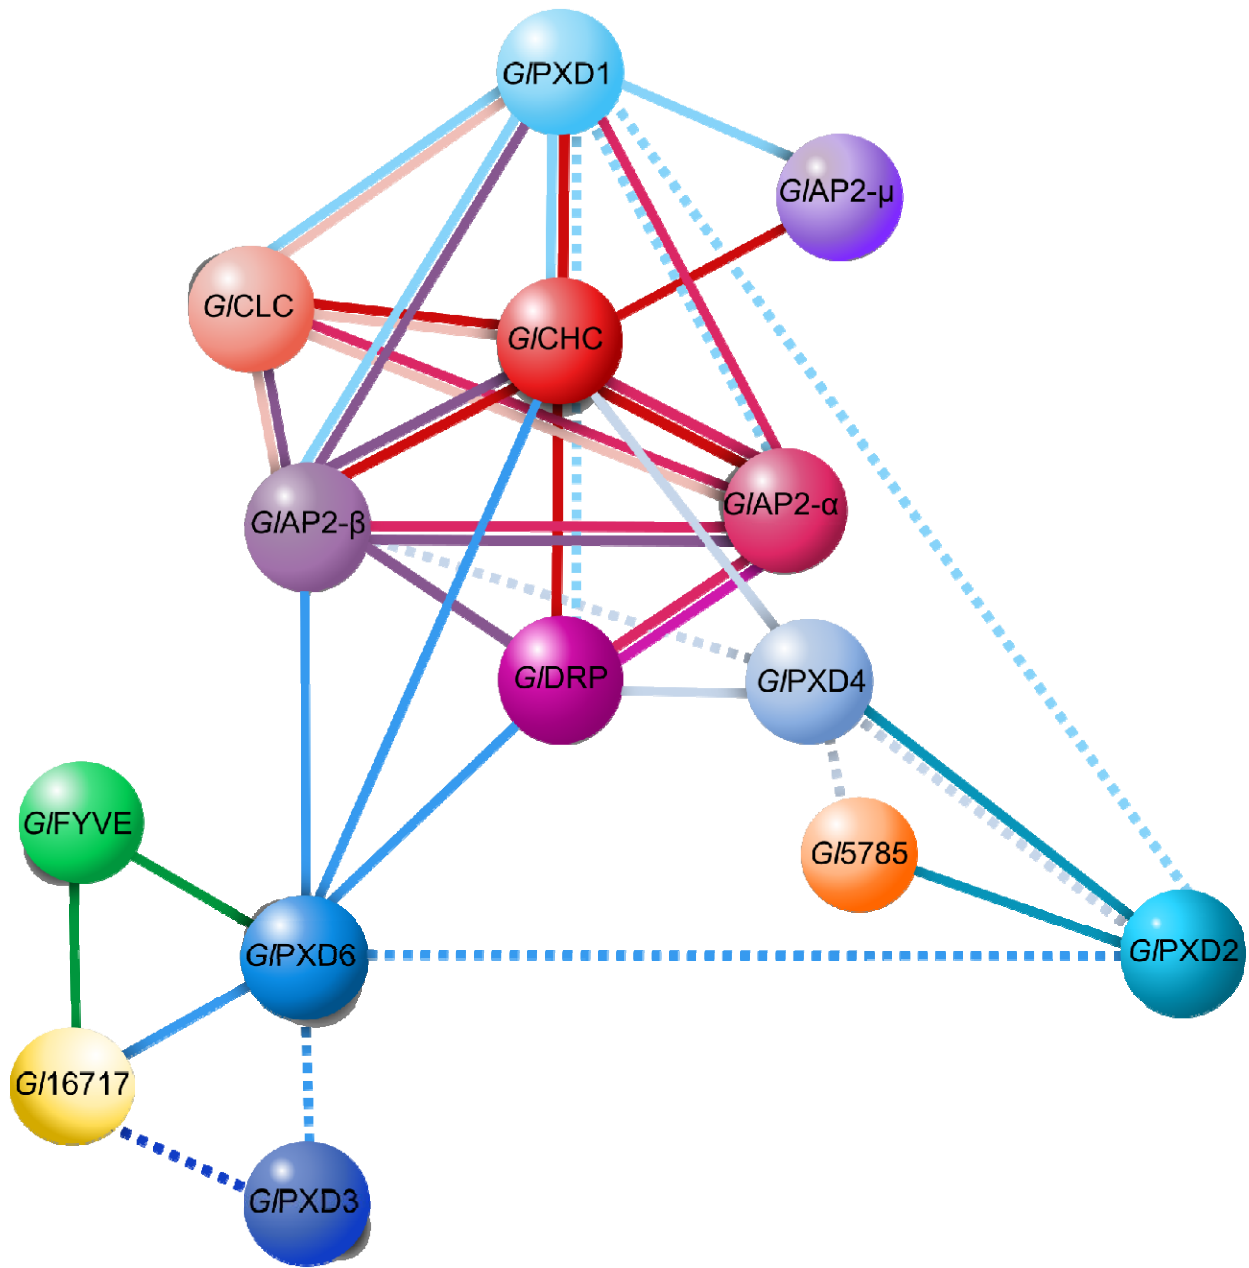

## Figure 7: Regulated ectopic expression of *GIFYVE* variants inhibits fluid-phase uptake and induces novel membrane-bound compartments

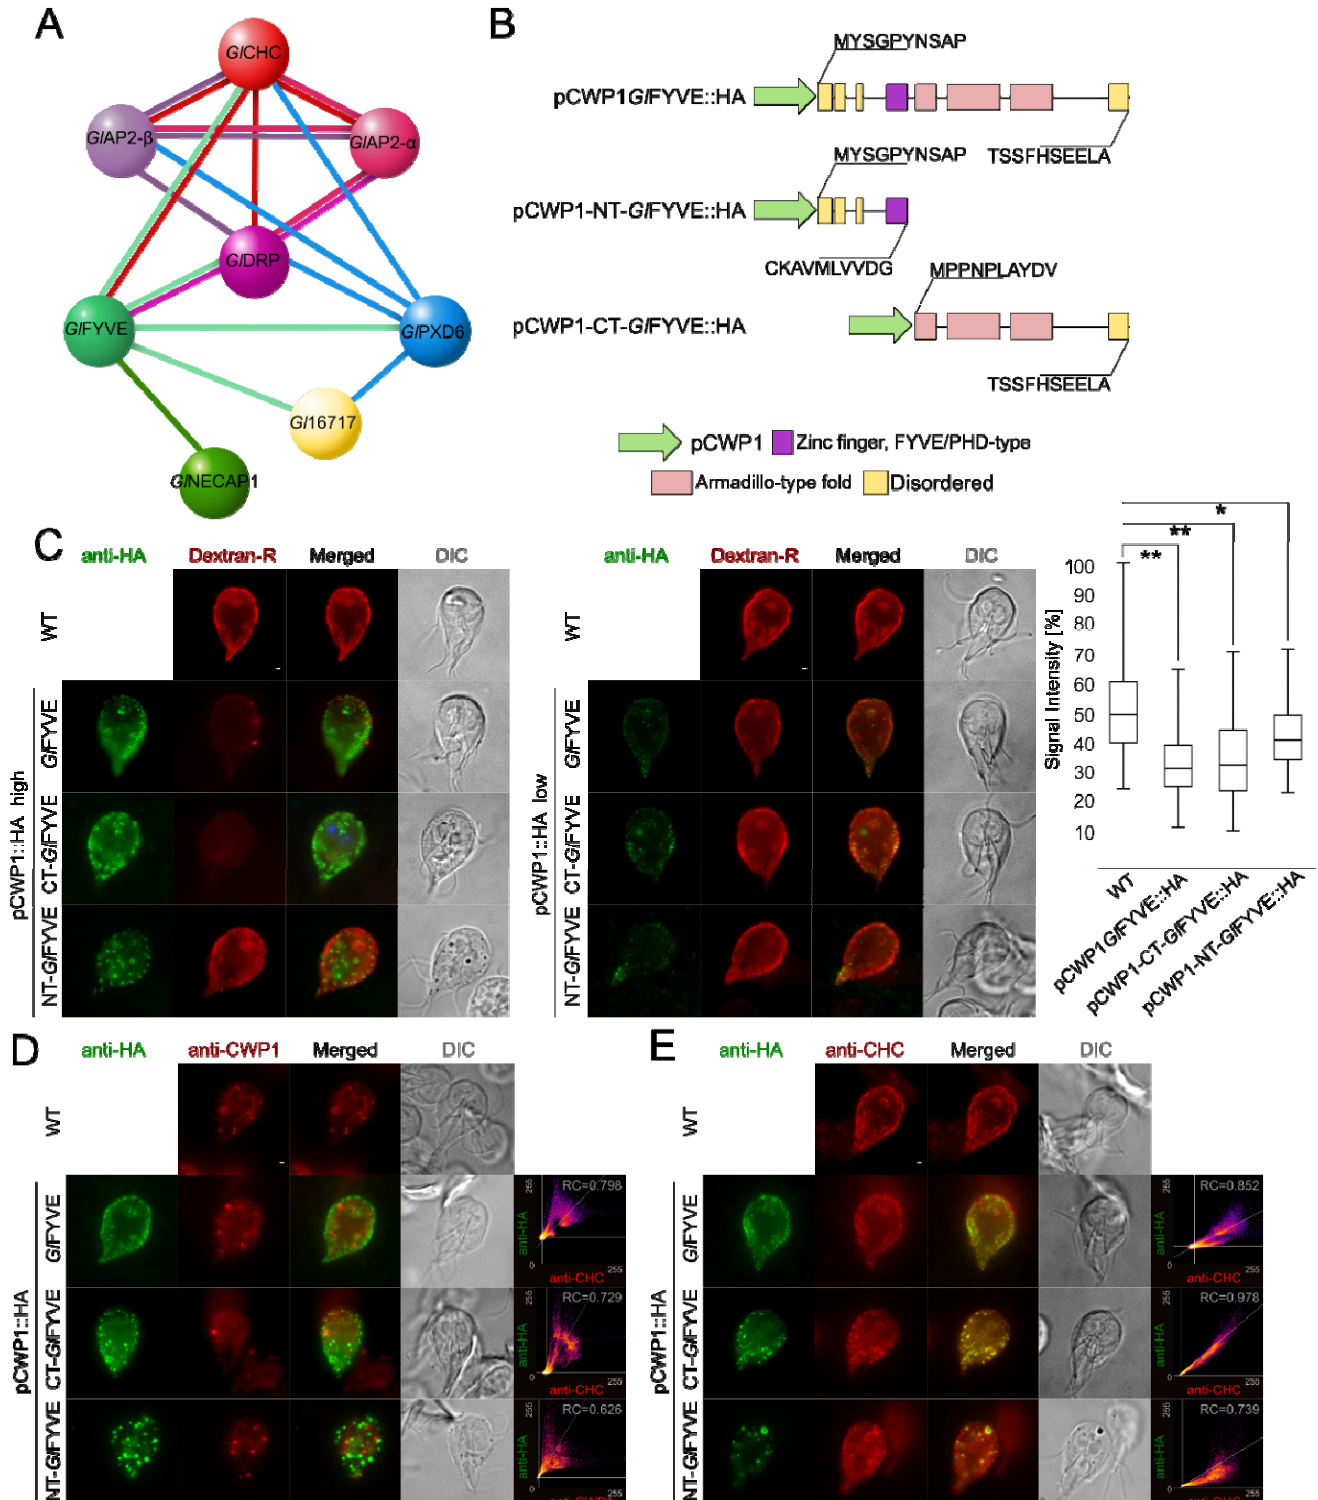

## Figure 6: The extended *GIPXD3* interactome includes a novel dynamin-like protein in *G. lamblia*

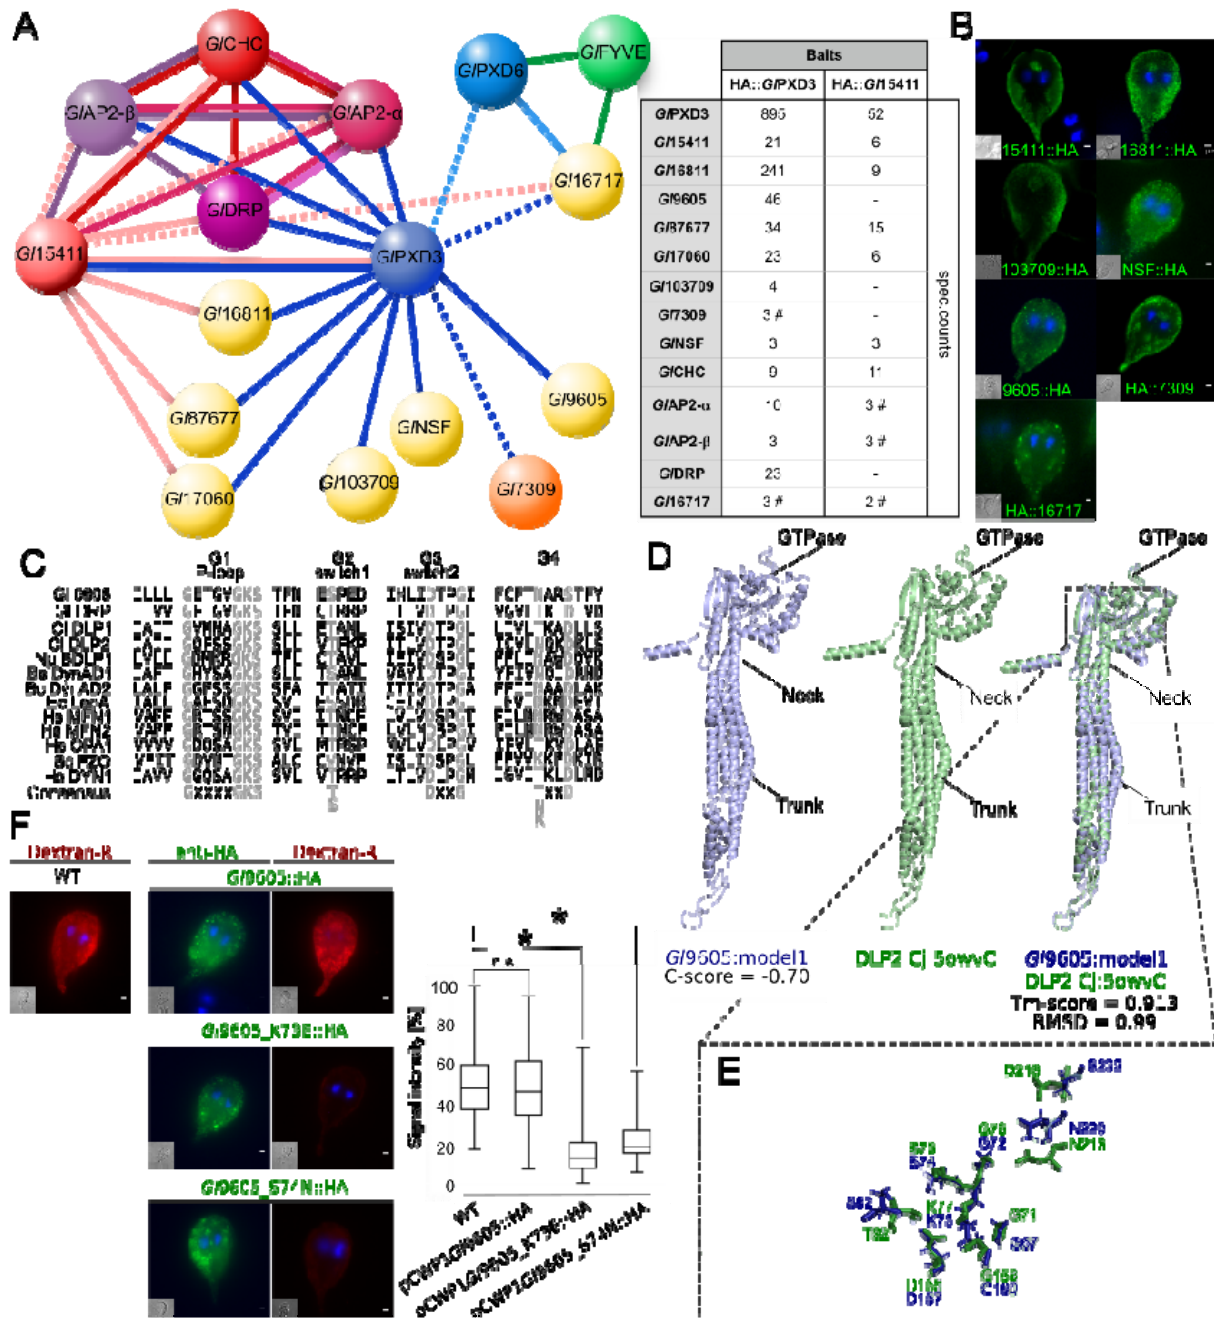



## Figure 7: Regulated ectopic expression of *GIFYE* variants inhibits fluid-phase uptake and induces novel membrane-bound compartments

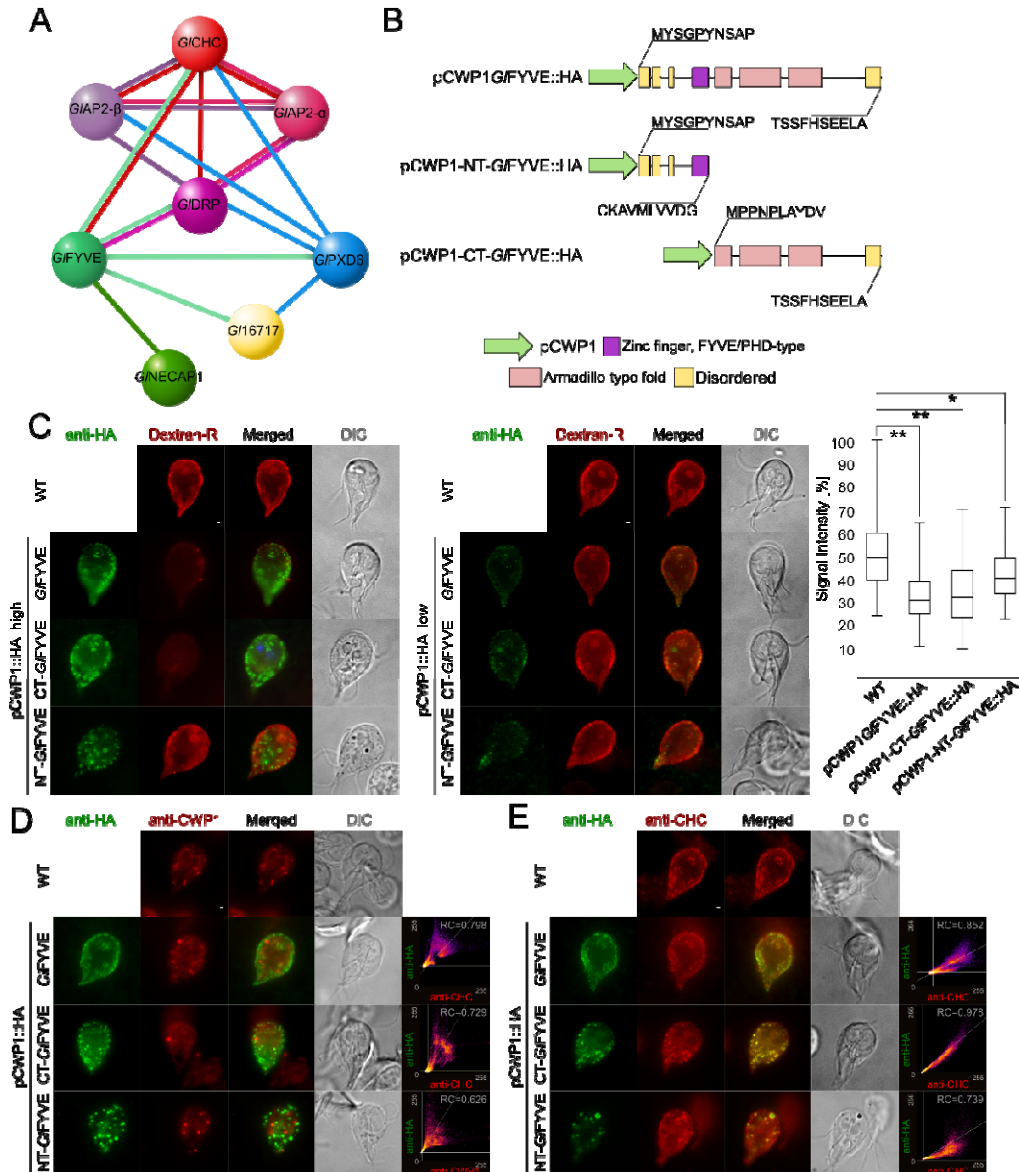

## Figure 8: PV morphology and functionality phenotypes caused by *GINECAP1* ectopic expression.

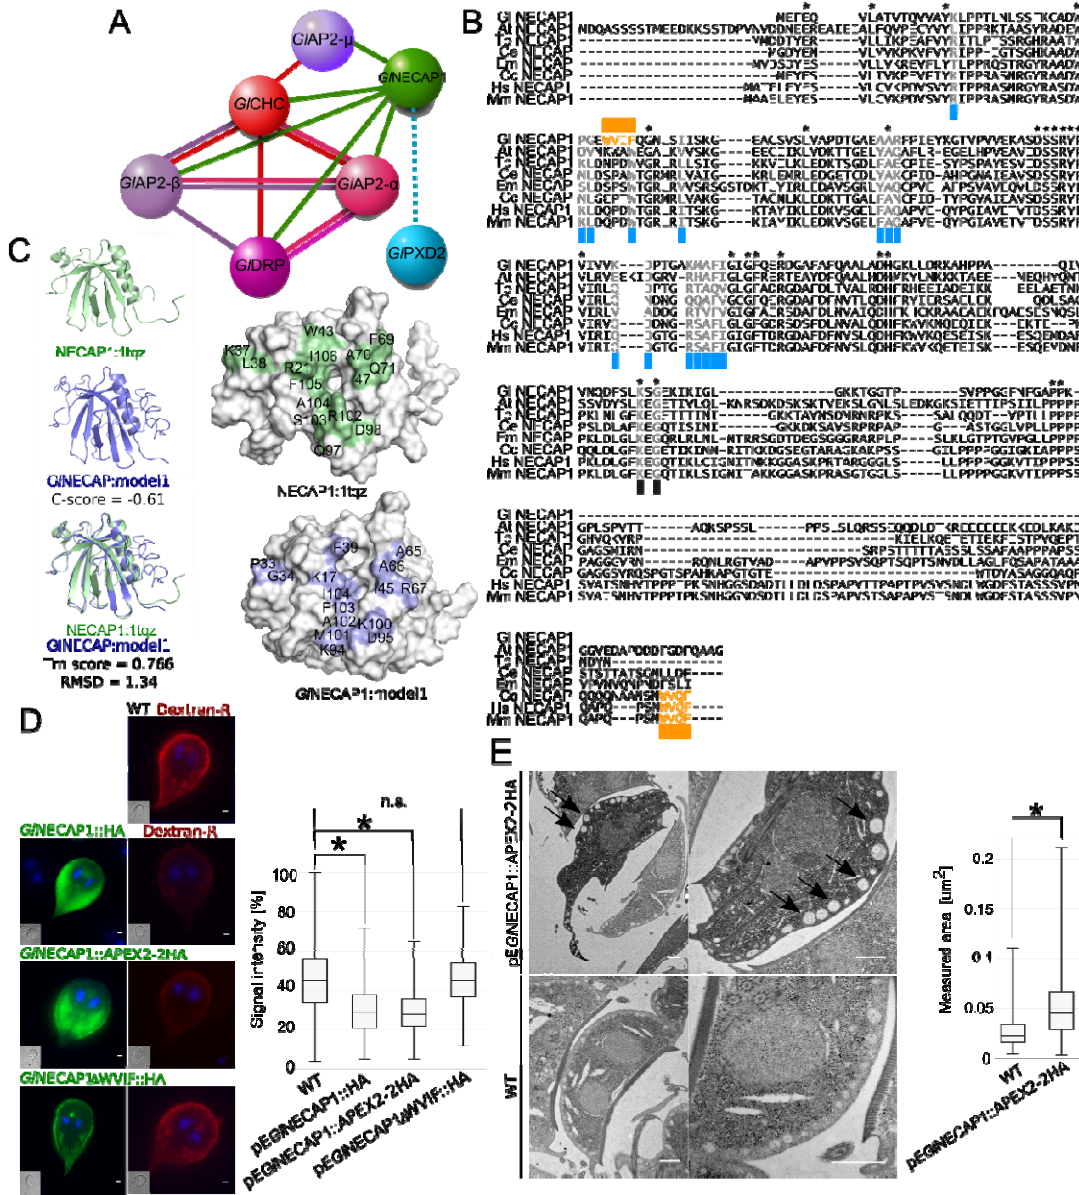

## Figure 9: GLPX<sub>D3</sub> membrane coats as a tool to probe PV size and organization

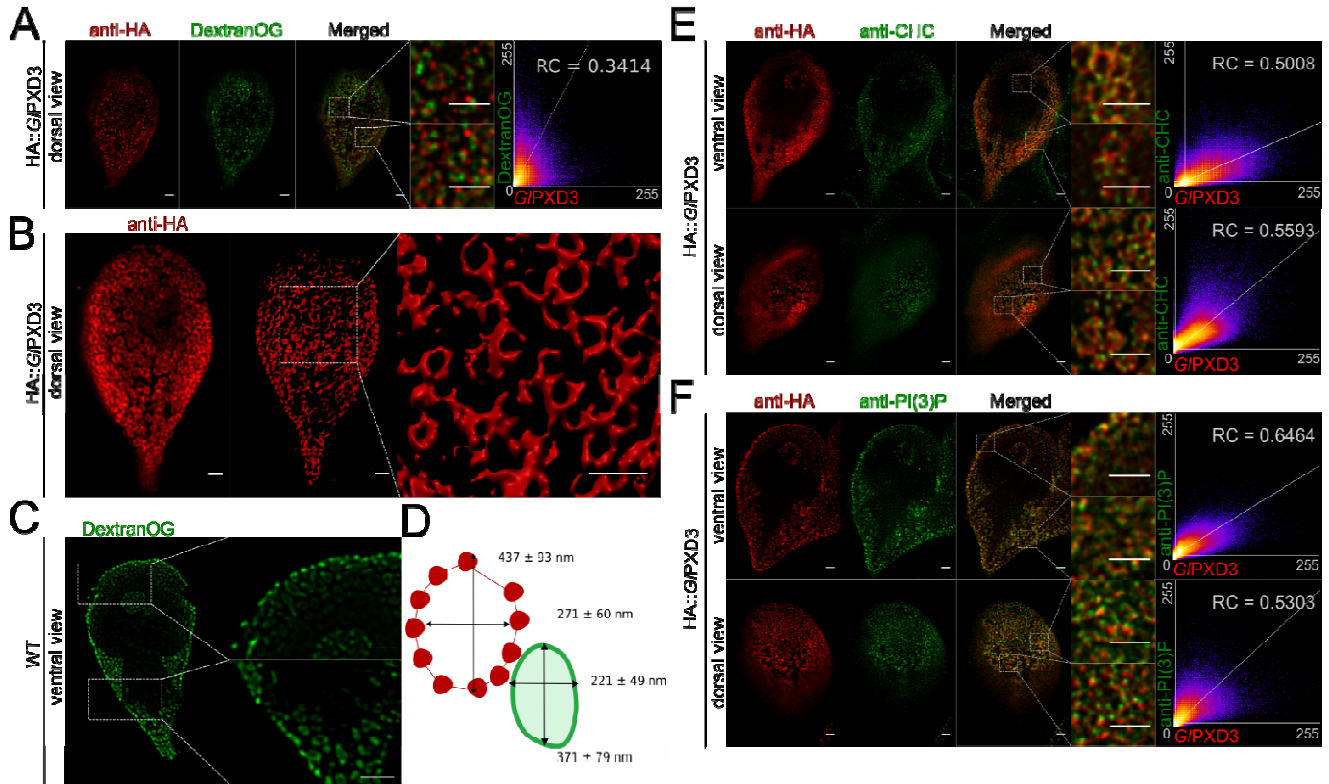



## Figure 10: A working model for PV-associated nanoenvironments defined by clathrin assemblies and PIP-binding proteins

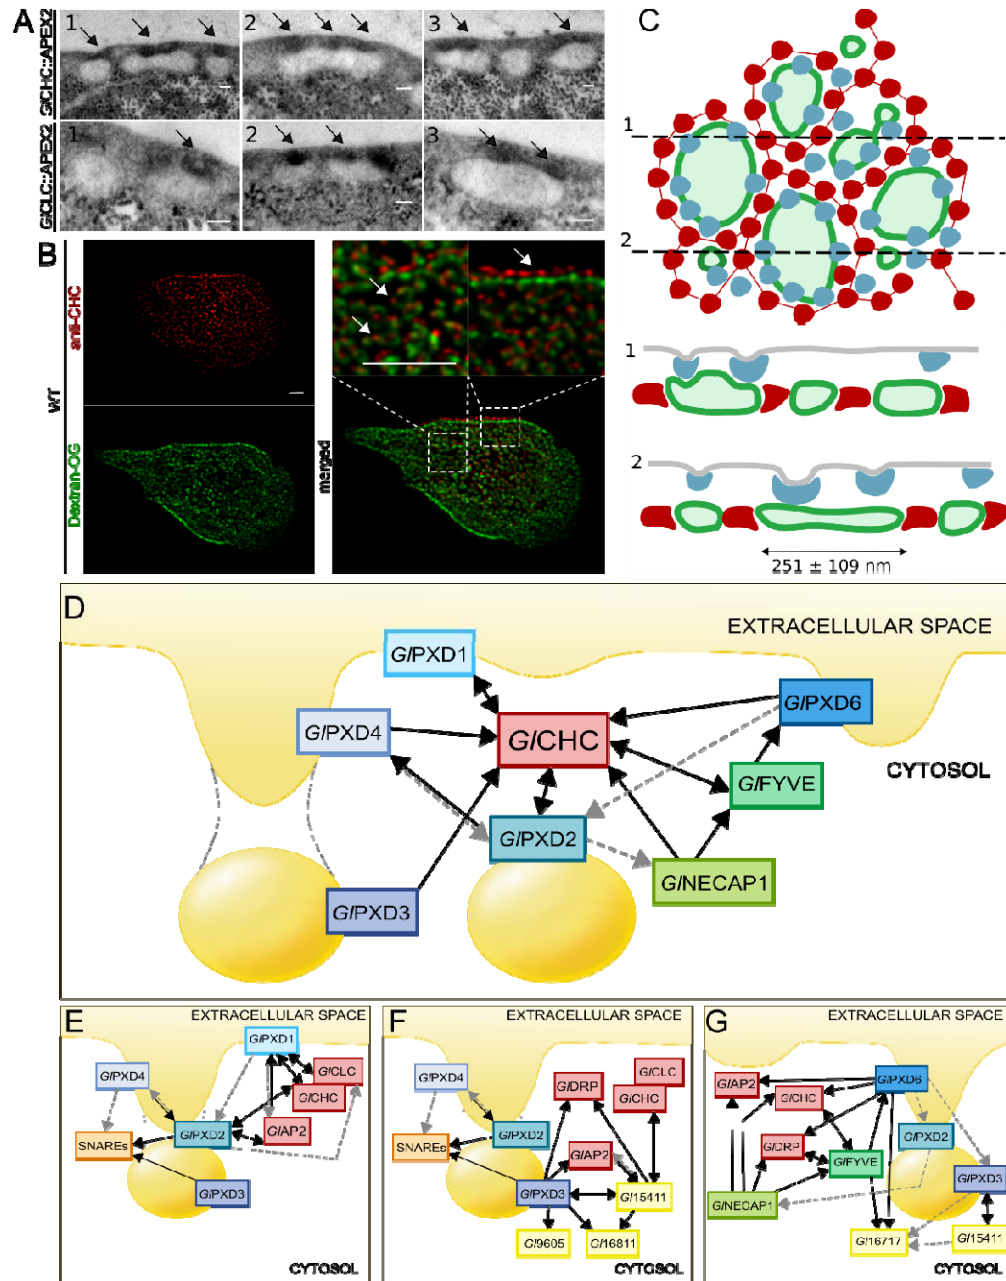

**Table 1: *G. lamblia* PIP-binding proteins.**

| Domain (UniProtKB entry)         | <i>G. lamblia</i> orthologs (UniProtKB entry, GDB gene_ID, Probability/E-value) | Sequence identity/similarity (%/%) <sup>1</sup> | 3D structure homologue (HHPRED *.pdb, Probability/E-value, Sequence identity/similarity (%/%) <sup>1</sup> , name used by HHPRED) | 3D structure homologue (I-TASSER *.pdb) <sup>2</sup> | <i>G. lamblia</i> ortholog Annotation on GDB | Name used in this study | Domains (online tool SMART)               | Localisation     | References                  |
|----------------------------------|---------------------------------------------------------------------------------|-------------------------------------------------|-----------------------------------------------------------------------------------------------------------------------------------|------------------------------------------------------|----------------------------------------------|-------------------------|-------------------------------------------|------------------|-----------------------------|
| <b>ENTH</b><br>(1H0A/O88339)     | A8BIK9, GL50803_3256<br>100/6e-37                                               | 28/56.1                                         | 6enr_100/2.4e-32 23/35<br>Epsin-1                                                                                                 | 3onk                                                 | EH domain binding<br>protein epsin 2         | <b>Glepsin</b>          | Pfam: ENTH<br>(4.8e-33)                   | Ventral disc/PVs | Ebneter 2014,<br>Touz 2015  |
| <b>PH</b><br>(1TQZ/Q9CR95)       | A8BII4, GL50803_17195<br>100/2.1e-54                                            | 36/61.3                                         | 1tqz_A 100/4.4e-52<br>36/61.3 NECAP-1                                                                                             | 1tqz                                                 | Hypothetical protein                         | <b>G/NECAP1</b>         | Pfam: DUF1681<br>(5.5e-43)                | PVs/Cytosolic    | Zumthor 2016                |
| <b>FYVE</b><br>(1HYI/Q15075)     | A8BDZ8, GL50803_16653<br>97.96/1.0e-8                                           | 39/92.1                                         | 3mpx_A 92.07/0.11<br>19/33.4 FYVE/RhoGEF<br>and PH-domain<br>containing protein                                                   | 1joc                                                 | Hypothetical protein                         | <b>G/FYVE</b>           | SMART: FYVE<br>(6.38e-18)                 | PVs              | Sinha 2011,<br>Zumthor 2016 |
|                                  | A8B288, GL50803_16801<br>79.39/0.64                                             | 28/75.6                                         | 317l_A 99.08/3.4e-13<br>34/96.2 Zinc finger<br>FYVE domain-<br>containing protein                                                 | 1vfy                                                 | Hypothetical protein                         | <b>G/I6801</b>          | FYVE/PHD zinc<br>finger (1.6e-05)         | PVs              | This study                  |
| <b>PX</b><br>(1H6H/Q15080)       | A8B343, GL50803_7723<br>96.5/8.5E-5                                             | 20/36.4                                         | 3lul_B 97.19/2.5e-5<br>20/32.1 SNX-17                                                                                             | 4oxw                                                 | Hypothetical protein                         | <b>G/IPXD1</b>          | SMART: PX<br>(7.2e-11)                    | PVs              | Zumthor 2016,<br>Jana 2017  |
|                                  | A8B344, GL50803_16595<br>99.4/6.2E-15                                           | 18/21.1                                         | 10cs_A 97.64/1.0e-6<br>23/36.2 SNX GRD19                                                                                          | 4on3                                                 | Liver stage antigen-<br>like protein         | <b>G/IPXD2</b>          | SMART: PX<br>(6.01e-11)                   | PVs              | Zumthor 2016,<br>Jana 2017  |
|                                  | A8B341, GL50803_16596<br>99.58/5.2E-17                                          | 18/23                                           | 4ikb_B 98.81/2.4e-10<br>22/38 SNX-11                                                                                              | 3iq2                                                 | Hypothetical protein                         | <b>G/IPXD3</b>          | SMART: PX<br>(2.11e-06)                   | PVs              | Jana 2017                   |
|                                  | A8B322, GL50803_42357<br>99.5/6.1E-16                                           | 21/27.9                                         | 4pqq_A 98.18/2.9e-7<br>14/20.2 SNX-14                                                                                             | 3iq2                                                 | Hypothetical protein                         | <b>G/IPXD4</b>          | SMART: PX<br>(1.62e-02)                   | PVs              | Jana 2017                   |
|                                  | A8BIZ8, GL50803_16548<br>99.53/3.7E-16                                          | 17/16.3                                         | 4ikb_B 99.59/2.0e-16<br>20/32.5 SNX-11                                                                                            | 2mxc                                                 | Hypothetical protein                         | <b>G/IPXD5</b>          | SMART: PX<br>(2.03e-08)                   | PVs              | Jana 2017                   |
|                                  | D3KH98, GL50803_24488                                                           | - <sup>3</sup>                                  | 4ikd_A 99.67/5.0e-18<br>15/35.5 SNX-11                                                                                            | 1xtn                                                 | Hypothetical protein                         | <b>G/IPXD6</b>          | SMART:PX<br>(1.89e-02)                    | PVs              | Jana 2017                   |
| <b>BAR</b><br>(2EFL/Q96RU3)      | A8BZ00, GL50803_15847<br>93.33/0.22                                             | 11/2.8                                          | 2v0o_B 96.41/0.047<br>11/14.7 FCH domain                                                                                          | 2v0o                                                 | Hypothetical protein                         | <b>G/BAR1</b>           | -                                         | PVs/Cytosolic    | Morrison 2007               |
|                                  | A8BMB7,<br>GL50803_14045<br>95.67/0.027                                         | 10/4.5                                          | 1uru_A 95.53/0.25<br>16/20.6 Amphiphysin                                                                                          | 1uru                                                 | Hypothetical protein                         | <b>G/BAR2</b>           | -                                         | PVs/Cytosolic    | Morrison 2007               |
| <b>FERM</b><br>(1E5W/P26038)     | A8BC43,<br>GL50803_115468<br>100/1e-33                                          | 12/11.1                                         | 6d2k_A 100/2.9e-38<br>10/7.7 FERM, ARHGEF<br>and PH-containing<br>protein                                                         | 5mv9                                                 | Hypothetical protein                         | <b>G/FERM</b>           | -                                         | Cytosolic        | This study                  |
| <b>PROPPINs</b><br>(4EXV/Q6CN23) | A8B6Z3, GL50803_10822<br>100/1e-29                                              | 21/36.3                                         | 3vu4_a 100/1.2e-36<br>23/38.1 KmHsv2                                                                                              | 4exv                                                 | WD-40 repeat family<br>protein               | <b>G/PROP1</b>          | SMART: WD40/<br>WD40<br>(9.6e-02/1.79e-1) | PVs/Cytosolic    | Rout 2016                   |
|                                  | A8BTE2, GL50803_16957<br>100/2e-31                                              | 16/25.9                                         | 5nnz_A 100/1.1e-36<br>14/8.5                                                                                                      | 4exv                                                 | WD-40 repeat family<br>protein               | <b>G/PROP2</b>          | SMART: WD40/<br>WD40<br>(2.80e-03/14.8)   | PVs/Cytosolic    | This study                  |

(1) Values for identity and similarity refer only to the predicted PIP-binding module  
(2) The \*.pdb identifiers in this column were used as modelling templates for giardial PIP-binding proteins (figure S1).  
(3) Protein GL50803\_24488 was found by searching GDB for PXD protein paralogues.

A compilation of all PIP-binding domains identified in the Giardia Genome Database ([www.giardiadb.org](http://www.giardiadb.org); GDB) using previously characterized domains [24] as baits for HMM-based homology searches (column 1). Predicted giardial orthologs are present for PIP-binding domains ENTH, PH, FYVE, PX, BAR, FERM and PROPPINS (column 2) and mostly retrieve the correct domains when used as a baits for reverse HHpred searches (column 4). Except for *Glepsin*, *G/IPXD2* and *G/PROP1* and 2, all others are currently annotated on GDB as generically “hypothetical”, *i.e.* of unknown function (column 6). Each orthologue was assigned a name used throughout this report (column 7). Functional domain predictions using SMART (<http://smart.embl-heidelberg.de/>; column 8) and subcellular localization data (column 9) either previously reported or acquired in this study (column 10), are also included.
